# Supplementary material for: A key genetic factor for fucosyllactose utilization affects infant gut microbiota development
Source: PubMed Central journal article supplement (PMC4931012; doi:10.1038/ncomms11939), 2016-06-24
Supplement: ncomms11939-s1.pdf [file ncomms11939-s1.pdf]

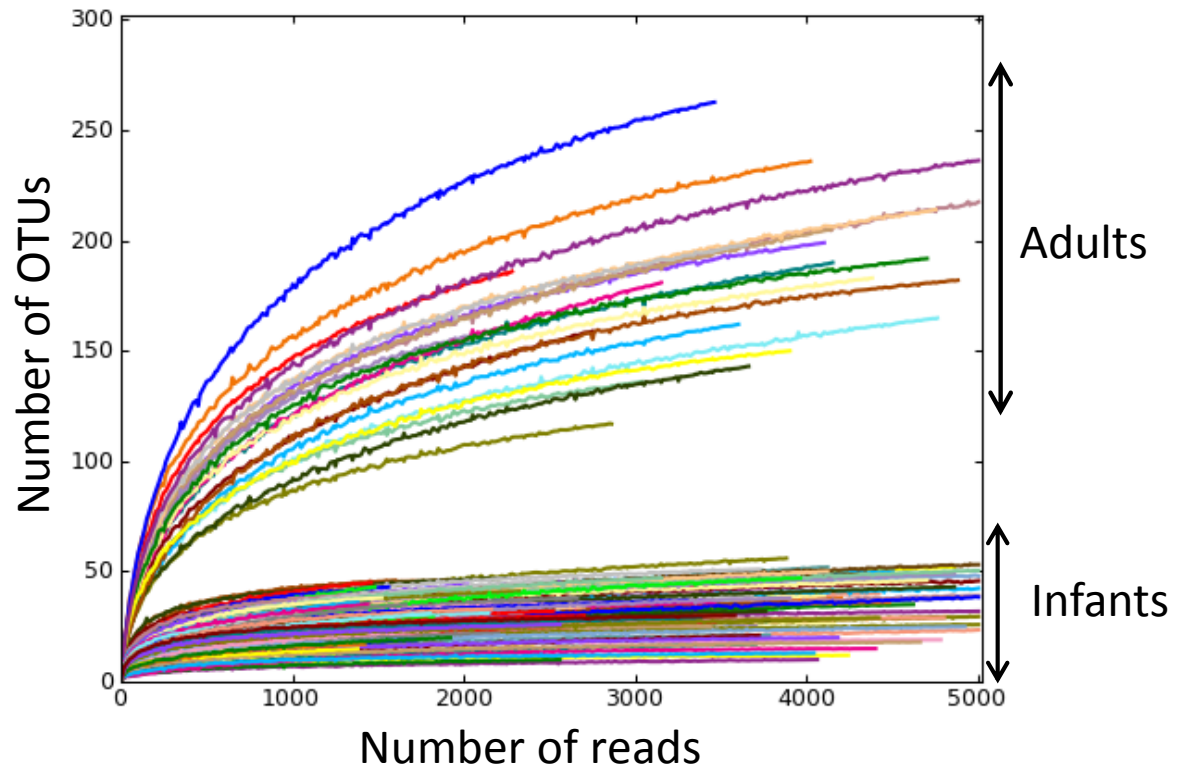

**Supplementary Fig. 1. OTU-richness rarefaction curves of faecal microbiota evaluated in 217 stool samples from 27 infants and 22 stool samples from 22 adults.**

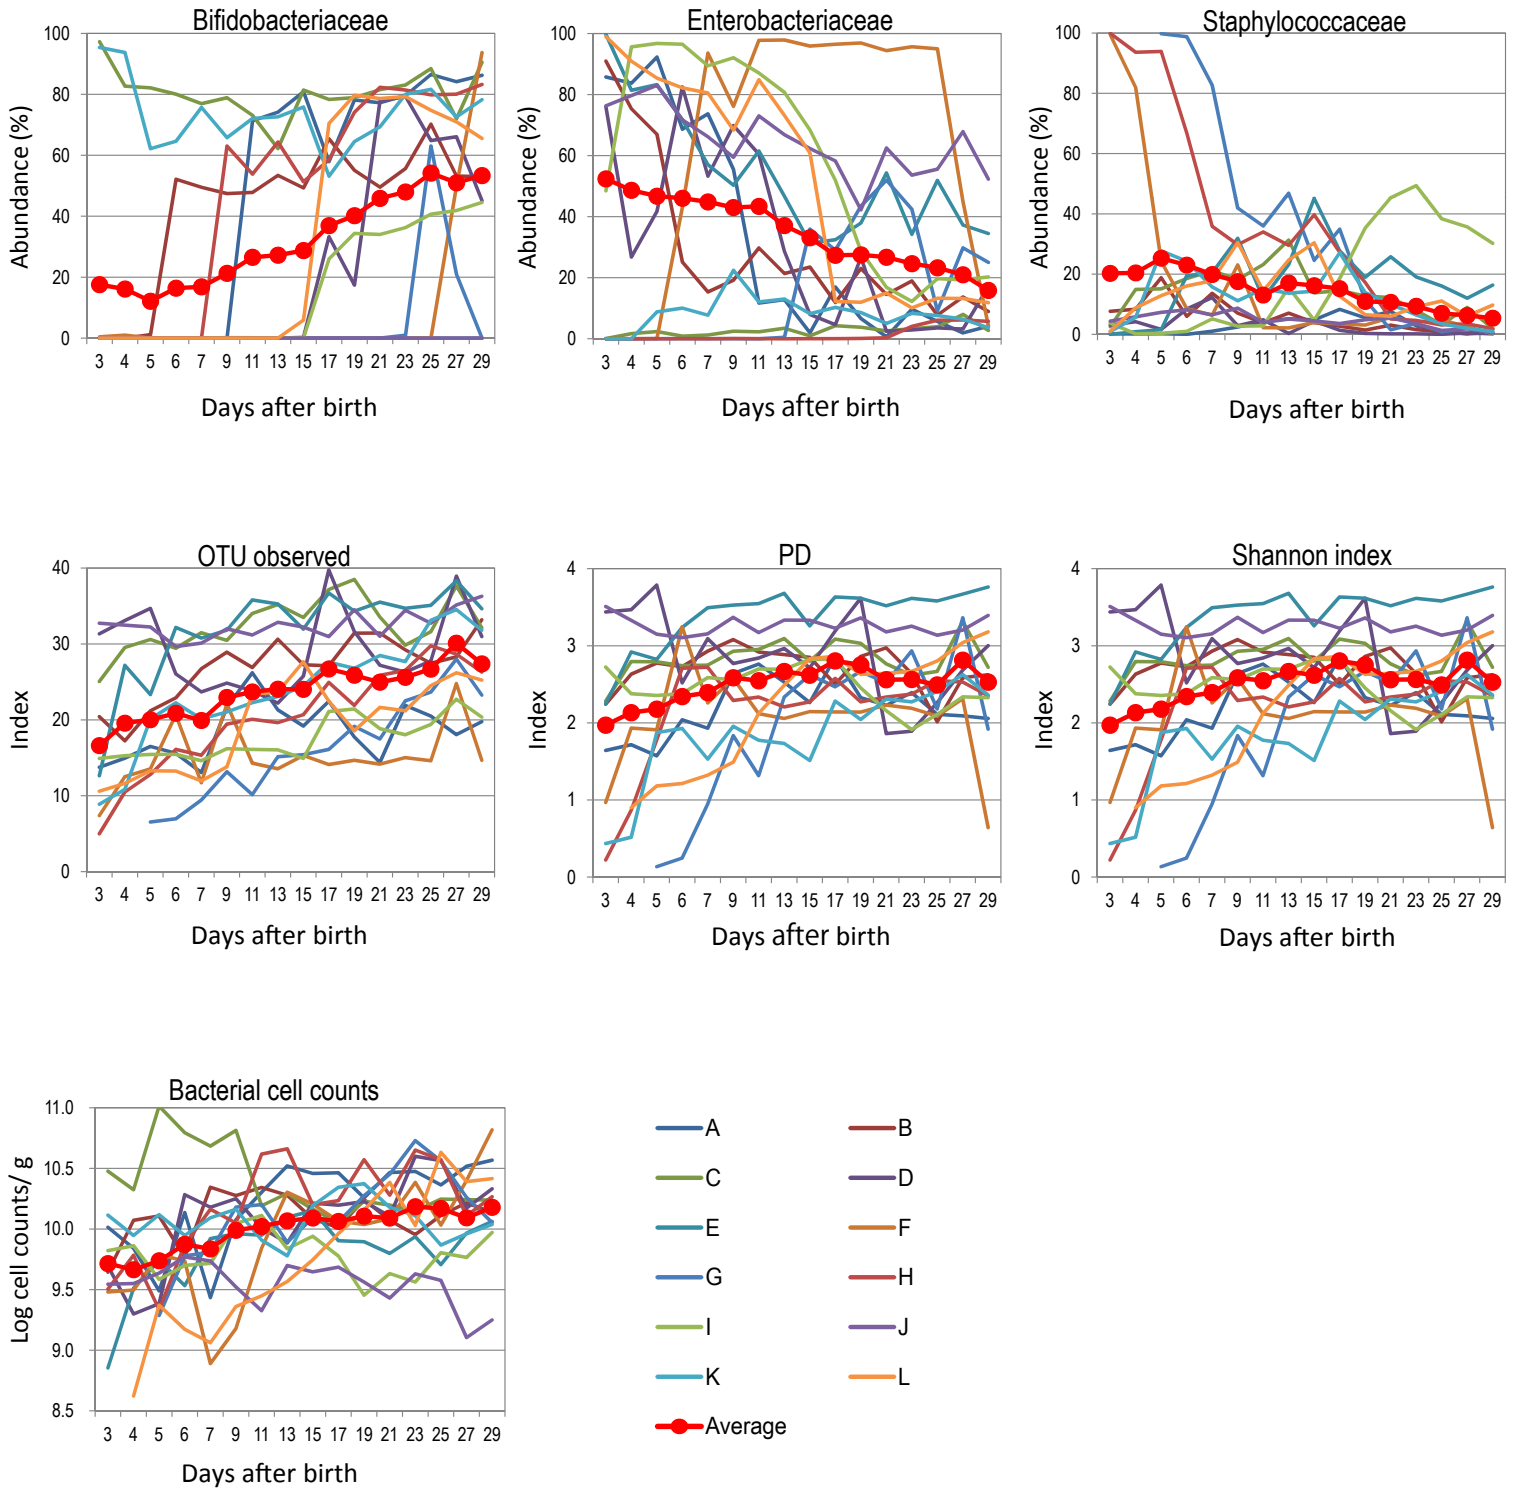

**Supplementary Fig. 2. Changes in bacterial abundances,  $\alpha$ -diversities, and total bacterial counts over the indicated days after birth. The values for each infant and the overall averages are shown.**

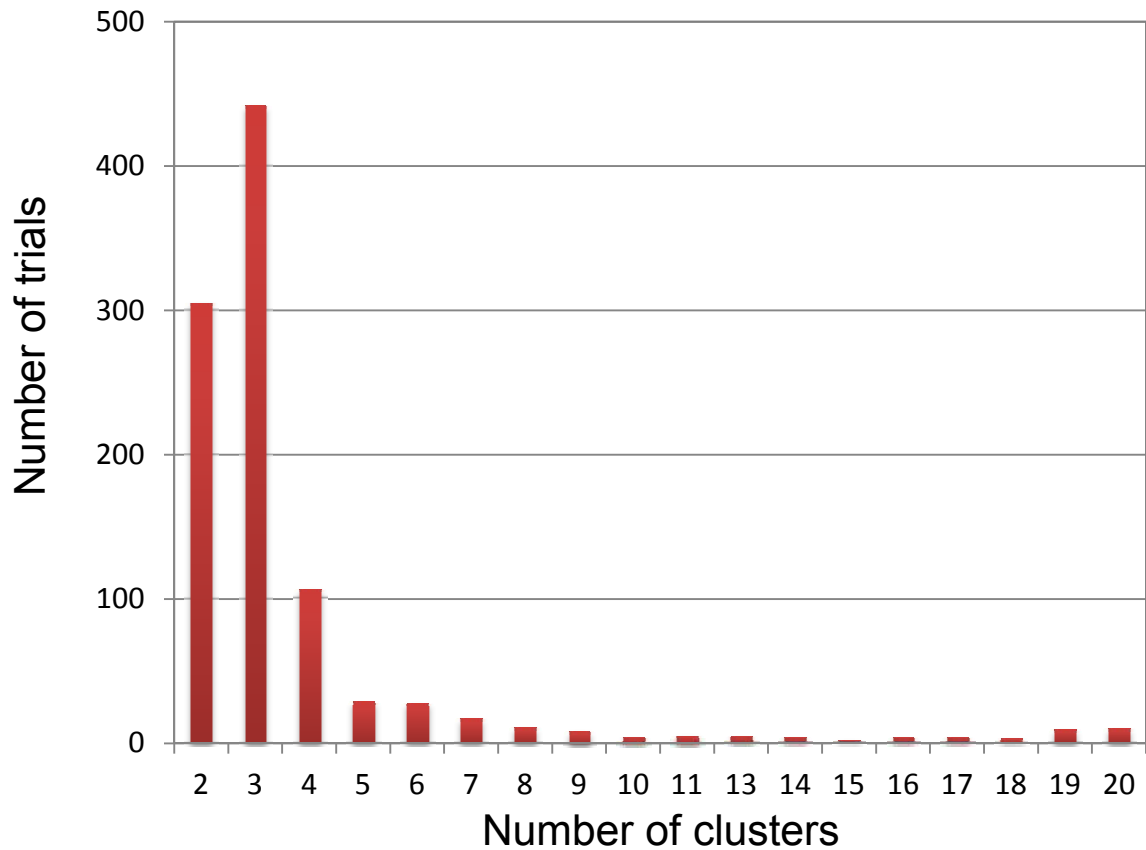

**Supplementary Fig. 3. Estimation of the number of clusters in infant gut microbiota by PAM clustering.** The number of clusters exhibiting the highest Calinski-Harabasz (CH) index was examined in the dataset of 100 randomly selected samples from a total of 202 samples (the trial was repeated 1,000 times), which indicate the presence of 3 distinct clusters in infant microbiota during 1st month of life.

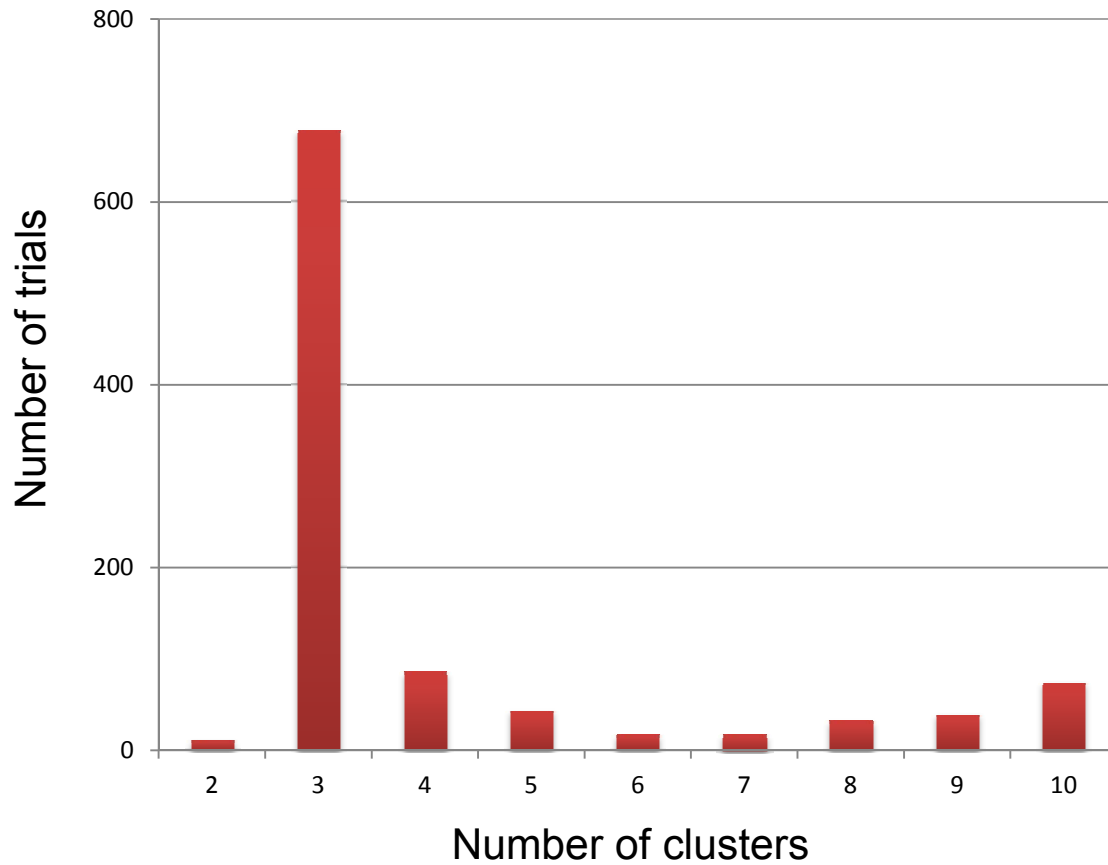

**Supplementary Fig. 4. Estimation of the number of clusters in infant and adult gut microbiota by PAM clustering.** The number of clusters exhibiting the highest Calinski-Harabasz (CH) index was examined in the dataset of 25 randomly selected samples from a total of 49 samples (the trial was repeated 1,000 times), which indicate the presence of 3 distinct clusters in microbiota of 1-month-old-infants and adults.

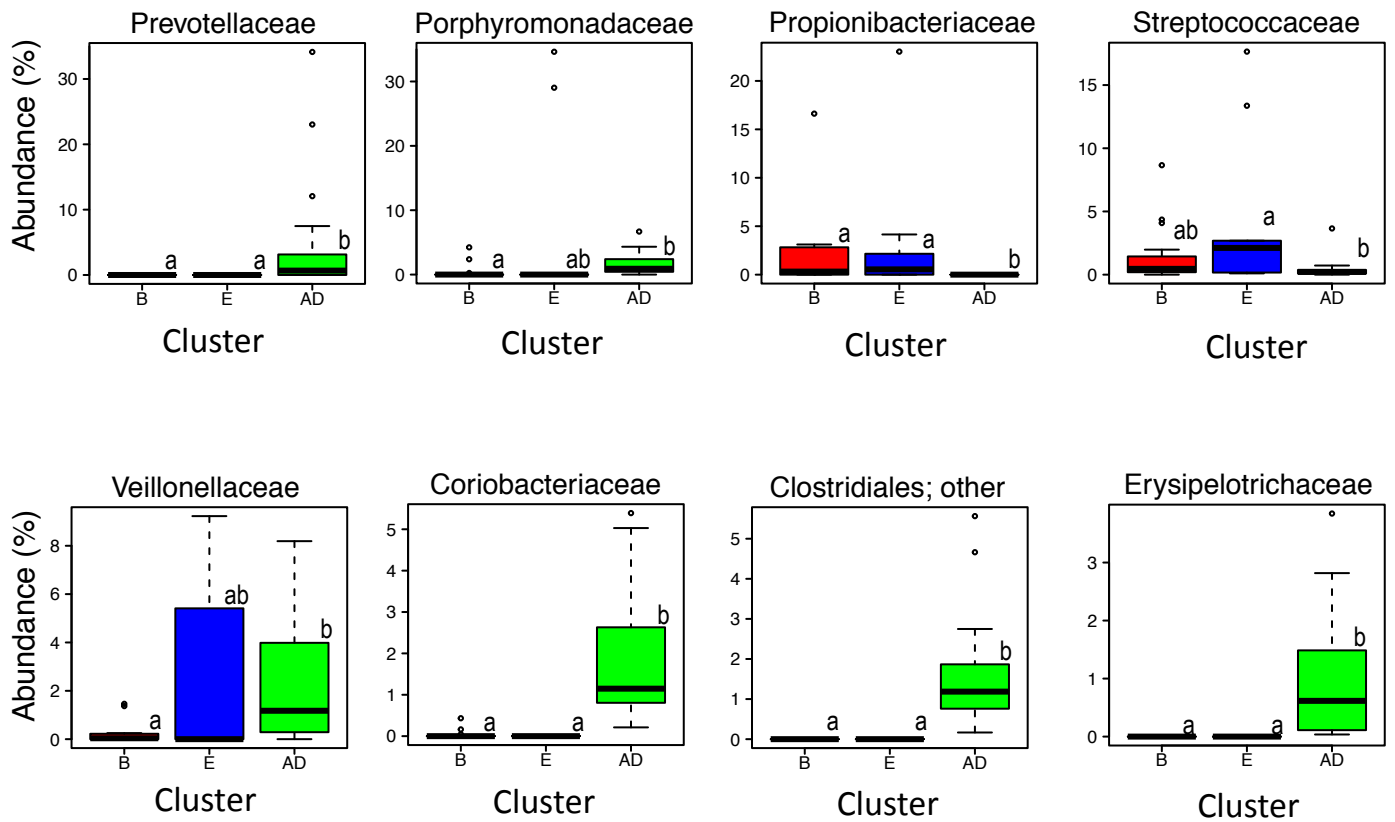

**Supplementary Fig. 5. Differences in bacterial abundances among the clusters.** Different letters (a–c) above the boxes indicate significant differences between groups ( $p < 0.05$ , Mann–Whitney U test with Bonferroni’s correction). Cluster B (Bifidobacteriaceae-predominant, red), cluster E (Enterobacteriaceae-predominant, blue) and cluster AD (adult-type microbiota, green) were compared.

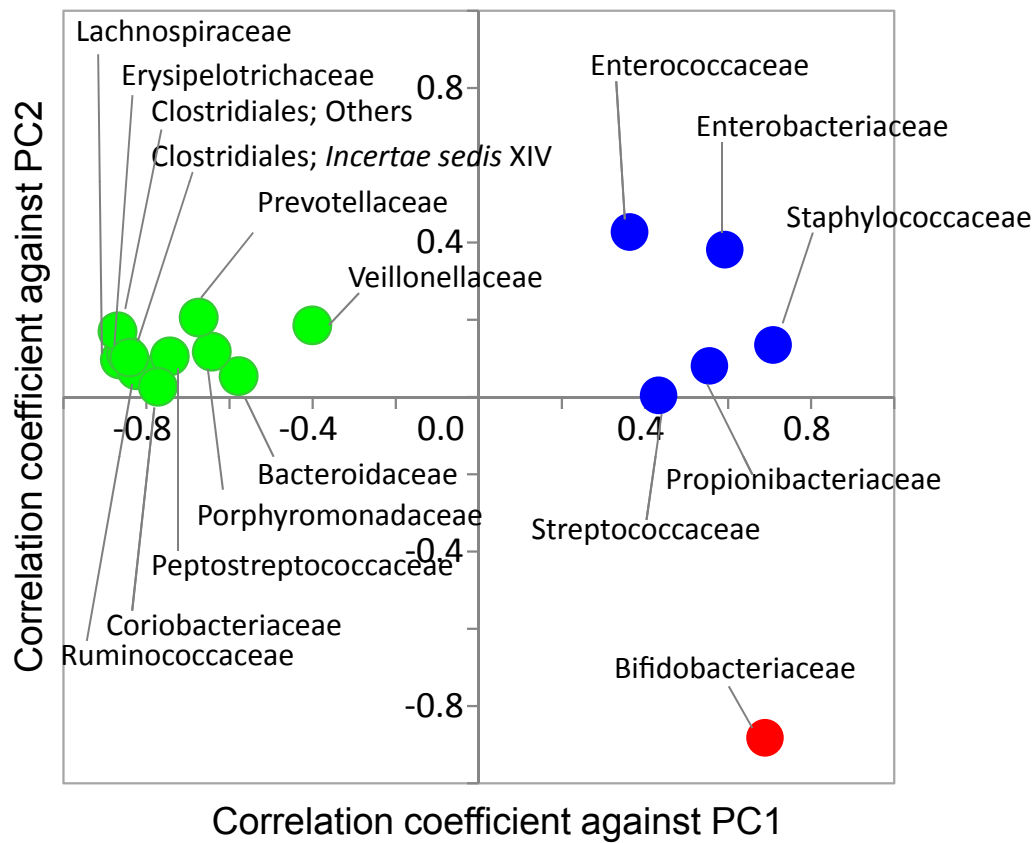

**Supplementary Fig. 6. Plot of Spearman's correlation coefficients between the abundances of bacterial taxa and the PC axes. The contributors of cluster B (red), E (blue), and AD (green) with average population  $\geq 1\%$  were shown.**

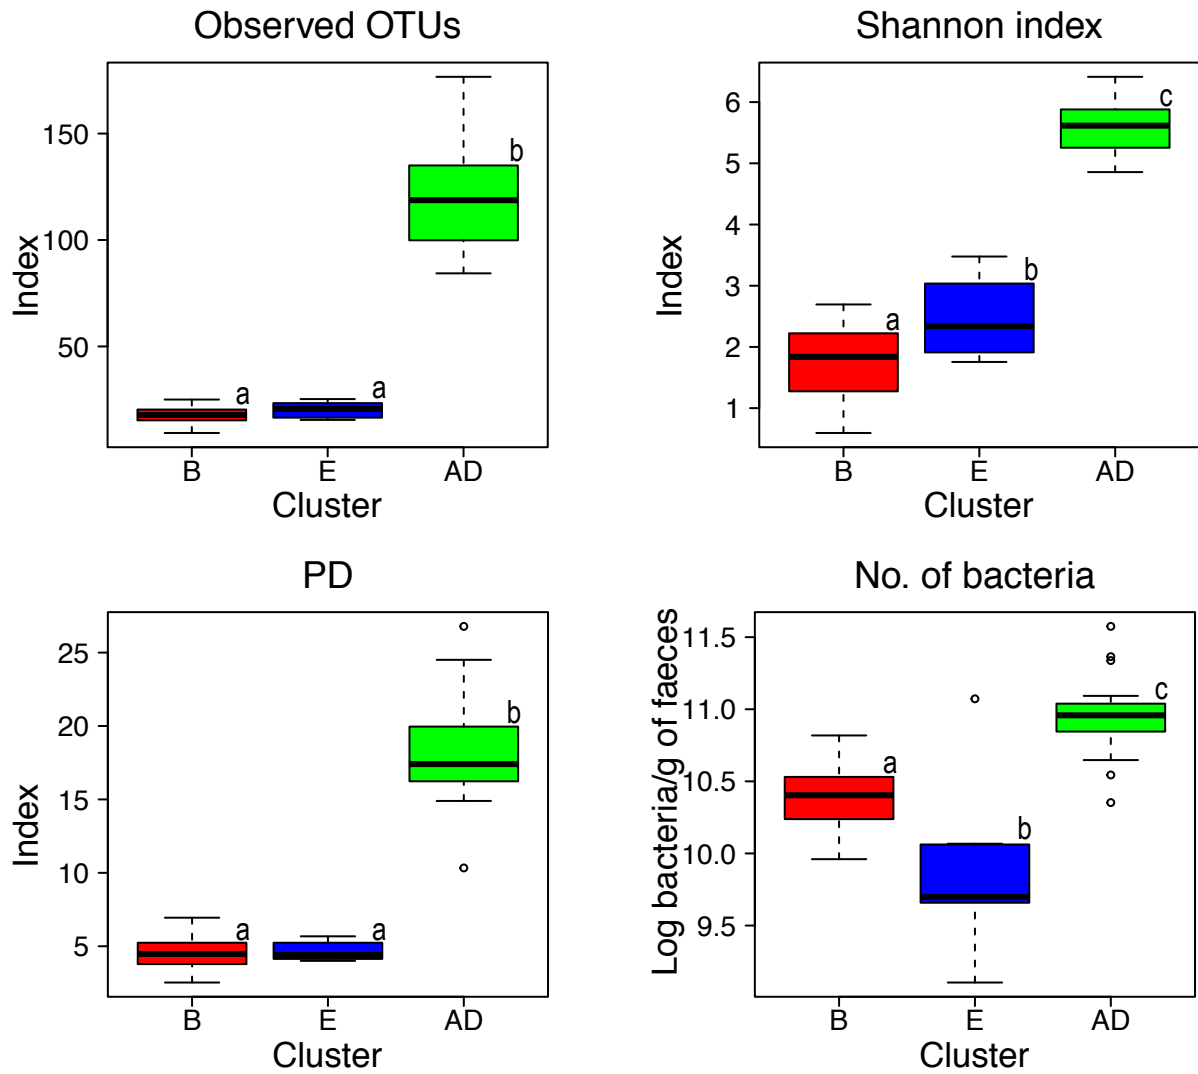

**Supplementary Fig. 7. Differences in  $\alpha$ -diversities and the numbers of bacteria among the clusters.** Different letters (a–c) above the boxes indicate significant differences between groups ( $p < 0.05$ , Mann–Whitney U test with Bonferroni’s correction). Cluster B, (Bifidobacteriaceae-predominant, red), cluster E (Enterobacteriaceae-predominant, blue) and cluster AD (adult-type microbiota, green) were compared.

| Bacterial family      | Average $\pm$ SD | Detected (%) | Bacterial abundance (%) |                    |                 |                |                   |                    |                  |                      |                 |                | No. of bacteria (log) | $\alpha$ -diversity |             |               |
|-----------------------|------------------|--------------|-------------------------|--------------------|-----------------|----------------|-------------------|--------------------|------------------|----------------------|-----------------|----------------|-----------------------|---------------------|-------------|---------------|
|                       |                  |              | Bifidobacteriaceae      | Enterobacteriaceae | Enterococcaceae | Bacteroidaceae | Staphylococcaceae | Porphyromonadaceae | Streptococcaceae | Propionibacteriaceae | Veillonellaceae | Clostridiaceae |                       | Observed OTUs       | PD          | Shannon index |
| Bifidobacteriaceae    | 53.9 $\pm$ 39.4  | 70.4         |                         | <u>-0.91</u>       | <u>-0.63</u>    | -0.02          | <u>-0.42</u>      | -0.10              | -0.21            | -0.23                | -0.05           | <u>-0.53</u>   | <u>0.67</u>           | <u>-0.47</u>        | -0.24       | <u>-0.65</u>  |
| Enterobacteriaceae    | 21.3 $\pm$ 23.8  | 96.3         |                         |                    | <u>0.66</u>     | -0.12          | <u>0.38</u>       | -0.07              | <u>0.29</u>      | 0.16                 | 0.13            | <u>0.46</u>    | <u>-0.67</u>          | 0.19                | 0.08        | <u>0.45</u>   |
| Enterococcaceae       | 5.1 $\pm$ 14.8   | 55.6         |                         |                    |                 | -0.21          | 0.15              | 0.05               | 0.06             | -0.04                | -0.01           | 0.13           | -0.32                 | 0.06                | -0.09       | 0.19          |
| Bacteroidaceae        | 4.4 $\pm$ 9.0    | 33.3         |                         |                    |                 |                | -0.19             | <u>0.64</u>        | <u>-0.40</u>     | -0.36                | -0.23           | 0.10           | -0.15                 | <u>0.56</u>         | 0.27        | 0.34          |
| Staphylococcaceae     | 4.2 $\pm$ 7.6    | 92.6         |                         |                    |                 |                |                   | -0.04              | <u>0.56</u>      | 0.07                 | 0.20            | <u>0.38</u>    | <u>-0.61</u>          | 0.23                | 0.13        | <u>0.49</u>   |
| Porphyromonadaceae    | 2.6 $\pm$ 8.5    | 18.5         |                         |                    |                 |                |                   |                    | -0.22            | -0.17                | -0.25           | -0.08          | -0.19                 | <u>0.54</u>         | 0.32        | 0.35          |
| Streptococcaceae      | 2.4 $\pm$ 4.3    | 96.3         |                         |                    |                 |                |                   |                    |                  | 0.03                 | <u>0.54</u>     | 0.15           | -0.24                 | 0.03                | 0.27        | 0.07          |
| Propionibacteriaceae  | 2.4 $\pm$ 5.3    | 59.3         |                         |                    |                 |                |                   |                    |                  |                      | 0.05            | 0.23           | 0.00                  | 0.08                | 0.24        | 0.19          |
| Veillonellaceae       | 1.1 $\pm$ 2.4    | 55.6         |                         |                    |                 |                |                   |                    |                  |                      |                 | -0.01          | -0.24                 | -0.01               | 0.37        | 0.01          |
| Clostridiaceae        | 1.1 $\pm$ 2.6    | 33.3         |                         |                    |                 |                |                   |                    |                  |                      |                 |                | -0.27                 | <u>0.40</u>         | <u>0.44</u> | <u>0.54</u>   |
| No. of bacteria (log) | 10.2 $\pm$ 0.4   | -            |                         |                    |                 |                |                   |                    |                  |                      |                 |                |                       | <u>-0.43</u>        | -0.14       | <u>-0.53</u>  |
| Observed OTUs         | 18.5 $\pm$ 4.2   | -            |                         |                    |                 |                |                   |                    |                  |                      |                 |                |                       |                     | <u>0.63</u> | <u>0.75</u>   |
| PD                    | 4.6 $\pm$ 0.9    | -            |                         |                    |                 |                |                   |                    |                  |                      |                 |                |                       |                     |             | <u>0.43</u>   |
| Shannon index         | 2.0 $\pm$ 0.7    | -            |                         |                    |                 |                |                   |                    |                  |                      |                 |                |                       |                     |             |               |

Correlation coefficients

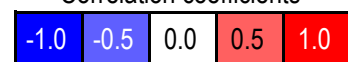

**Supplementary Fig. 8. Correlation matrix for the 27 1-month-old infants in this study.**

Spearman's rank correlation coefficients between bacterial family abundances (average;  $\geq 1\%$ ), numbers of bacteria, and  $\alpha$ -diversities are shown numerically and in colour-scale. Underlining indicates p values  $< 0.05$ . Of the 45 values, 11 were statistically significant in infants.



| Bacterial family                 | Average $\pm$ SD | Detected (%) | Bacterial abundance (%) |                     |                    |                 |                |                |                       |                 |                    |                   |                    |                            |                |                     | No. of bacteria (log) | $\alpha$ -diversity |             |               |  |
|----------------------------------|------------------|--------------|-------------------------|---------------------|--------------------|-----------------|----------------|----------------|-----------------------|-----------------|--------------------|-------------------|--------------------|----------------------------|----------------|---------------------|-----------------------|---------------------|-------------|---------------|--|
|                                  |                  |              | Lachnospiraceae         | Clostridiales (XIV) | Bifidobacteriaceae | Ruminococcaceae | Bacteroidaceae | Prevotellaceae | Peptostreptococcaceae | Veillonellaceae | Enterobacteriaceae | Coriobacteriaceae | Porphyromonadaceae | Clostridiales unclassified | Eubacteriaceae | Erysipelotrichaceae |                       | Observed OTUs       | PD          | Shannon index |  |
| Lachnospiraceae                  | 30.9 $\pm$ 12.1  | 100          |                         | 0.17                | -0.21              | -0.14           | -0.24          | -0.20          | -0.07                 | <u>-0.48</u>    | <u>-0.44</u>       | -0.17             | <u>-0.44</u>       | 0.05                       | <u>-0.55</u>   | 0.02                | -0.37                 | -0.26               | -0.26       | -0.09         |  |
| Clostridiales Incertae Sedis XIV | 15.4 $\pm$ 7.3   | 100          |                         |                     | -0.20              | -0.03           | <u>-0.59</u>   | 0.01           | -0.31                 | -0.12           | -0.27              | 0.07              | -0.35              | 0.34                       | 0.18           | 0.19                | -0.09                 | 0.06                | 0.13        | 0.03          |  |
| Bifidobacteriaceae               | 14.3 $\pm$ 10.9  | 91           |                         |                     |                    | -0.28           | -0.17          | <u>-0.58</u>   | 0.14                  | -0.16           | <u>0.54</u>        | 0.01              | -0.28              | <u>-0.59</u>               | -0.17          | -0.19               | -0.17                 | <u>-0.44</u>        | -0.21       | <u>-0.42</u>  |  |
| Ruminococcaceae                  | 11.4 $\pm$ 5.3   | 100          |                         |                     |                    |                 | 0.30           | 0.06           | 0.20                  | <u>0.42</u>     | -0.33              | -0.08             | 0.34               | 0.19                       | 0.05           | 0.23                | <u>0.60</u>           | <u>0.70</u>         | <u>0.65</u> | <u>0.70</u>   |  |
| Bacteroidaceae                   | 7.4 $\pm$ 5.5    | 100          |                         |                     |                    |                 |                | -0.01          | 0.36                  | 0.00            | -0.07              | <u>-0.47</u>      | <u>0.52</u>        | -0.13                      | -0.04          | -0.04               | 0.35                  | 0.32                | 0.13        | 0.28          |  |
| Prevotellaceae                   | 4.3 $\pm$ 8.6    | 64           |                         |                     |                    |                 |                |                | 0.01                  | 0.39            | 0.05               | <u>0.43</u>       | 0.42               | <u>0.44</u>                | 0.28           | 0.01                | 0.15                  | <u>0.45</u>         | 0.41        | <u>0.45</u>   |  |
| Peptostreptococcaceae            | 2.7 $\pm$ 3.4    | 95           |                         |                     |                    |                 |                |                |                       | 0.36            | -0.03              | 0.20              | -0.13              | -0.15                      | -0.06          | 0.36                | -0.11                 | 0.03                | 0.17        | 0.15          |  |
| Veillonellaceae                  | 2.2 $\pm$ 2.5    | 91           |                         |                     |                    |                 |                |                |                       |                 | -0.18              | <u>0.42</u>       | 0.22               | 0.08                       | <u>0.51</u>    | <u>0.45</u>         | 0.23                  | <u>0.44</u>         | 0.40        | <u>0.43</u>   |  |
| Enterobacteriaceae               | 1.9 $\pm$ 5.6    | 59           |                         |                     |                    |                 |                |                |                       |                 |                    | 0.14              | 0.02               | -0.25                      | -0.06          | -0.38               | -0.04                 | -0.25               | -0.09       | -0.28         |  |
| Coriobacteriaceae                | 1.8 $\pm$ 1.5    | 100          |                         |                     |                    |                 |                |                |                       |                 |                    |                   | <u>-0.24</u>       | 0.16                       | 0.14           | -0.02               | -0.30                 | -0.08               | 0.08        | -0.16         |  |
| Porphyromonadaceae               | 1.6 $\pm$ 1.8    | 95           |                         |                     |                    |                 |                |                |                       |                 |                    |                   |                    | 0.29                       | 0.29           | 0.01                | <u>0.57</u>           | <u>0.68</u>         | <u>0.49</u> | <u>0.58</u>   |  |
| Clostridiales unclassified       | 1.6 $\pm$ 1.3    | 100          |                         |                     |                    |                 |                |                |                       |                 |                    |                   |                    |                            | 0.08           | 0.19                | 0.20                  | 0.28                | 0.15        | 0.25          |  |
| Eubacteriaceae                   | 1.2 $\pm$ 3.3    | 73           |                         |                     |                    |                 |                |                |                       |                 |                    |                   |                    |                            |                | 0.31                | 0.21                  | 0.34                | 0.31        | 0.17          |  |
| Erysipelotrichaceae              | 1 $\pm$ 1.1      | 100          |                         |                     |                    |                 |                |                |                       |                 |                    |                   |                    |                            |                |                     | 0.20                  | 0.35                | 0.33        | 0.39          |  |
| No. of bacteria (log)            | 11 $\pm$ 0.3     | -            |                         |                     |                    |                 |                |                |                       |                 |                    |                   |                    |                            |                |                     |                       | <u>0.72</u>         | <u>0.66</u> | <u>0.68</u>   |  |
| Observed OTUs                    | 120 $\pm$ 23     | -            |                         |                     |                    |                 |                |                |                       |                 |                    |                   |                    |                            |                |                     |                       |                     | <u>0.89</u> | <u>0.91</u>   |  |
| PD                               | 18.2 $\pm$ 3.5   | -            |                         |                     |                    |                 |                |                |                       |                 |                    |                   |                    |                            |                |                     |                       |                     |             | <u>0.81</u>   |  |
| Shannon index                    | 5.6 $\pm$ 0.5    | -            |                         |                     |                    |                 |                |                |                       |                 |                    |                   |                    |                            |                |                     |                       |                     |             |               |  |

Correlation coefficients

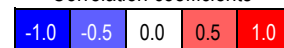

**Supplementary Fig. 9.** Correlation matrix for 22 adult volunteers. Spearman's rank correlation coefficients between bacterial family abundances (average;  $\geq 1\%$ ), total bacterial counts, and  $\alpha$ -diversities are shown numerically and in color-scale values. Underlining indicates p values  $< 0.05$ . Of the 91 values, 16 were statistically significant in adults.

|                       | Average ± SD | % detected | Family abundance (%) |                    |                 |                |                   |                    |                  |                      |                 |                | pH           | Organic acids (mM) |              |              |              |              |                     | No. of bacteria (log) | Faecal oligosaccharides (summary, mM) |                |                  |              | Faecal oligosaccharides (detail, mM) |              |              |              |              |              |              |              |             |
|-----------------------|--------------|------------|----------------------|--------------------|-----------------|----------------|-------------------|--------------------|------------------|----------------------|-----------------|----------------|--------------|--------------------|--------------|--------------|--------------|--------------|---------------------|-----------------------|---------------------------------------|----------------|------------------|--------------|--------------------------------------|--------------|--------------|--------------|--------------|--------------|--------------|--------------|-------------|
|                       |              |            | Bifidobacteriaceae   | Enterobacteriaceae | Enterococcaceae | Bacteroidaceae | Staphylococcaceae | Porphyromonadaceae | Streptococcaceae | Propionibacteriaceae | Veillonellaceae | Clostridiaceae |              | Acetate            | Lactate      | Succinate    | Propionate   | Formate      | Total organic acids |                       | Sum (FL)                              | Sum (LNT+LNnT) | Sum (LNFP+LNDFH) | Total HMO    | 2'-FL                                | 3-FL         | DFL          | LNT          | LNnT         | LNFP         | LNDFH I      | LNDFH II     |             |
| Bifidobacteriaceae    | 54 ± 39      | 70         |                      | <u>-0.91</u>       | <u>-0.63</u>    | -0.02          | <u>-0.42</u>      | -0.10              | -0.21            | -0.23                | -0.05           | <u>-0.53</u>   | <u>-0.53</u> | <u>0.47</u>        | <u>0.39</u>  | <u>-0.58</u> | -0.20        | <u>0.74</u>  | <u>0.36</u>         | <u>0.67</u>           | <u>-0.59</u>                          | <u>-0.48</u>   | <u>-0.40</u>     | <u>-0.56</u> | <u>-0.53</u>                         | <u>-0.68</u> | <u>-0.39</u> | <u>-0.53</u> | 0.00         | <u>-0.44</u> | <u>-0.28</u> | 0.04         |             |
| Enterobacteriaceae    | 21 ± 24      | 96         |                      |                    | <u>0.66</u>     | <u>-0.12</u>   | <u>0.38</u>       | -0.07              | <u>0.29</u>      | <u>0.16</u>          | <u>0.13</u>     | <u>0.46</u>    | <u>0.59</u>  | <u>-0.49</u>       | <u>-0.32</u> | <u>0.50</u>  | <u>0.24</u>  | <u>-0.74</u> | <u>-0.39</u>        | <u>-0.67</u>          | <u>0.61</u>                           | <u>0.54</u>    | <u>0.35</u>      | <u>0.57</u>  | <u>0.54</u>                          | <u>0.71</u>  | <u>0.36</u>  | <u>0.58</u>  | 0.00         | <u>0.48</u>  | <u>0.15</u>  | -0.04        |             |
| Enterococcaceae       | 5.1 ± 14.8   | 56         |                      |                    |                 | <u>-0.21</u>   | <u>0.15</u>       | <u>0.05</u>        | <u>0.06</u>      | <u>-0.04</u>         | <u>-0.01</u>    | <u>0.13</u>    | <u>0.31</u>  | <u>-0.25</u>       | <u>-0.15</u> | <u>0.33</u>  | <u>0.30</u>  | <u>-0.30</u> | <u>-0.15</u>        | <u>-0.34</u>          | <u>0.35</u>                           | <u>0.33</u>    | <u>0.20</u>      | <u>0.34</u>  | <u>0.38</u>                          | <u>0.40</u>  | <u>0.29</u>  | <u>0.42</u>  | <u>-0.05</u> | <u>0.34</u>  | <u>0.14</u>  | -0.15        |             |
| Bacteroidaceae        | 4.4 ± 9      | 33         |                      |                    |                 |                | <u>-0.19</u>      | <u>0.64</u>        | <u>-0.40</u>     | <u>-0.36</u>         | <u>-0.23</u>    | <u>0.10</u>    | <u>-0.43</u> | <u>0.29</u>        | <u>-0.06</u> | <u>0.34</u>  | <u>-0.07</u> | <u>-0.20</u> | <u>0.20</u>         | <u>-0.14</u>          | <u>-0.24</u>                          | <u>-0.29</u>   | <u>-0.15</u>     | <u>-0.31</u> | <u>-0.06</u>                         | <u>-0.26</u> | <u>-0.39</u> | <u>-0.34</u> | <u>-0.10</u> | <u>-0.20</u> | <u>-0.20</u> | -0.10        |             |
| Staphylococcaceae     | 4.2 ± 7.6    | 93         |                      |                    |                 |                |                   | <u>-0.04</u>       | <u>0.56</u>      | <u>0.07</u>          | <u>0.20</u>     | <u>0.38</u>    | <u>0.38</u>  | <u>-0.49</u>       | <u>-0.13</u> | <u>0.02</u>  | <u>-0.16</u> | <u>-0.38</u> | <u>-0.46</u>        | <u>-0.58</u>          | <u>0.20</u>                           | <u>0.11</u>    | <u>0.39</u>      | <u>0.32</u>  | <u>0.30</u>                          | <u>0.32</u>  | <u>0.08</u>  | <u>0.13</u>  | <u>0.03</u>  | <u>0.32</u>  | <u>0.35</u>  | <u>0.23</u>  |             |
| Porphyromonadaceae    | 2.6 ± 8.5    | 19         |                      |                    |                 |                |                   |                    | <u>-0.22</u>     | <u>-0.17</u>         | <u>-0.25</u>    | <u>-0.08</u>   | <u>-0.43</u> | <u>0.32</u>        | <u>0.12</u>  | <u>0.21</u>  | <u>0.15</u>  | <u>0.02</u>  | <u>0.32</u>         | <u>-0.23</u>          | <u>-0.08</u>                          | <u>0.00</u>    | <u>0.16</u>      | <u>-0.04</u> | <u>-0.11</u>                         | <u>-0.10</u> | <u>-0.07</u> | <u>0.00</u>  | <u>0.11</u>  | <u>0.03</u>  | <u>0.07</u>  | <u>0.33</u>  |             |
| Streptococcaceae      | 2.4 ± 4.3    | 96         |                      |                    |                 |                |                   |                    |                  | <u>0.03</u>          | <u>0.54</u>     | <u>0.15</u>    | <u>0.45</u>  | <u>-0.22</u>       | <u>0.09</u>  | <u>-0.13</u> | <u>-0.14</u> | <u>-0.11</u> | <u>-0.18</u>        | <u>-0.21</u>          | <u>0.13</u>                           | <u>0.22</u>    | <u>0.29</u>      | <u>0.26</u>  | <u>0.00</u>                          | <u>0.28</u>  | <u>0.01</u>  | <u>0.34</u>  | <u>-0.14</u> | <u>0.28</u>  | <u>0.17</u>  | <u>0.13</u>  |             |
| Propionibacteriaceae  | 2.4 ± 5.3    | 59         |                      |                    |                 |                |                   |                    |                  |                      | <u>0.05</u>     | <u>0.23</u>    | <u>0.46</u>  | <u>-0.49</u>       | <u>-0.60</u> | <u>-0.03</u> | <u>0.26</u>  | <u>-0.28</u> | <u>-0.47</u>        | <u>-0.03</u>          | <u>0.46</u>                           | <u>0.31</u>    | <u>0.38</u>      | <u>0.51</u>  | <u>0.19</u>                          | <u>0.33</u>  | <u>0.53</u>  | <u>0.18</u>  | <u>0.45</u>  | <u>0.35</u>  | <u>0.44</u>  | <u>0.31</u>  |             |
| Veillonellaceae       | 1.1 ± 2.4    | 56         |                      |                    |                 |                |                   |                    |                  |                      |                 | <u>-0.01</u>   | <u>0.47</u>  | <u>-0.23</u>       | <u>-0.07</u> | <u>-0.01</u> | <u>0.28</u>  | <u>-0.06</u> | <u>-0.23</u>        | <u>-0.21</u>          | <u>0.13</u>                           | <u>0.31</u>    | <u>0.22</u>      | <u>0.19</u>  | <u>-0.11</u>                         | <u>0.31</u>  | <u>0.02</u>  | <u>0.34</u>  | <u>-0.09</u> | <u>0.28</u>  | <u>0.03</u>  | <u>0.15</u>  |             |
| Clostridiaceae        | 1.1 ± 2.6    | 33         |                      |                    |                 |                |                   |                    |                  |                      |                 |                | <u>0.44</u>  | <u>-0.35</u>       | <u>-0.42</u> | <u>0.25</u>  | <u>-0.09</u> | <u>-0.44</u> | <u>-0.33</u>        | <u>-0.25</u>          | <u>0.48</u>                           | <u>0.10</u>    | <u>0.25</u>      | <u>0.40</u>  | <u>0.52</u>                          | <u>0.40</u>  | <u>0.32</u>  | <u>0.04</u>  | <u>0.00</u>  | <u>0.22</u>  | <u>0.29</u>  | <u>-0.05</u> |             |
| pH                    | 5.9 ± 0.6    | -          |                      |                    |                 |                |                   |                    |                  |                      |                 |                |              | <u>-0.76</u>       | <u>-0.43</u> | <u>0.09</u>  | <u>0.15</u>  | <u>-0.54</u> | <u>-0.73</u>        | <u>-0.30</u>          | <u>0.62</u>                           | <u>0.54</u>    | <u>0.39</u>      | <u>0.67</u>  | <u>0.37</u>                          | <u>0.71</u>  | <u>0.30</u>  | <u>0.43</u>  | <u>0.22</u>  | <u>0.53</u>  | <u>0.19</u>  | <u>0.12</u>  |             |
| Acetate               | 30.5 ± 35.3  | 100        |                      |                    |                 |                |                   |                    |                  |                      |                 |                |              |                    | <u>0.60</u>  | <u>-0.04</u> | <u>-0.11</u> | <u>0.63</u>  | <u>0.95</u>         | <u>0.44</u>           | <u>-0.72</u>                          | <u>-0.34</u>   | <u>-0.60</u>     | <u>-0.77</u> | <u>-0.55</u>                         | <u>-0.68</u> | <u>-0.27</u> | <u>-0.29</u> | <u>-0.32</u> | <u>-0.70</u> | <u>-0.46</u> | <u>-0.26</u> |             |
| Lactate               | 12.9 ± 31    | 63         |                      |                    |                 |                |                   |                    |                  |                      |                 |                |              |                    |              | <u>-0.11</u> | <u>-0.36</u> | <u>0.49</u>  | <u>0.66</u>         | <u>0.28</u>           | <u>-0.53</u>                          | <u>-0.05</u>   | <u>-0.40</u>     | <u>-0.50</u> | <u>-0.41</u>                         | <u>-0.32</u> | <u>-0.31</u> | <u>-0.02</u> | <u>-0.23</u> | <u>-0.41</u> | <u>-0.39</u> | <u>-0.12</u> |             |
| Succinate             | 8.9 ± 12     | 93         |                      |                    |                 |                |                   |                    |                  |                      |                 |                |              |                    |              |              | <u>-0.04</u> | <u>-0.50</u> | <u>0.09</u>         | <u>-0.28</u>          | <u>0.18</u>                           | <u>0.19</u>    | <u>0.04</u>      | <u>0.09</u>  | <u>0.23</u>                          | <u>0.32</u>  | <u>0.18</u>  | <u>0.12</u>  | <u>-0.07</u> | <u>0.09</u>  | <u>-0.07</u> | <u>-0.05</u> |             |
| Propionate            | 1.1 ± 1.9    | 33         |                      |                    |                 |                |                   |                    |                  |                      |                 |                |              |                    |              |              |              |              | <u>-0.05</u>        | <u>-0.12</u>          | <u>-0.20</u>                          | <u>0.22</u>    | <u>0.25</u>      | <u>0.36</u>  | <u>0.26</u>                          | <u>0.02</u>  | <u>0.29</u>  | <u>0.32</u>  | <u>0.36</u>  | <u>0.06</u>  | <u>0.33</u>  | <u>0.32</u>  | <u>0.19</u> |
| Formate               | 1.3 ± 2.5    | 30         |                      |                    |                 |                |                   |                    |                  |                      |                 |                |              |                    |              |              |              |              |                     | <u>0.57</u>           | <u>0.58</u>                           | <u>-0.55</u>   | <u>-0.30</u>     | <u>-0.28</u> | <u>-0.52</u>                         | <u>-0.52</u> | <u>-0.66</u> | <u>-0.08</u> | <u>-0.22</u> | <u>-0.06</u> | <u>-0.42</u> | <u>-0.11</u> | <u>0.11</u> |
| Total organic acids   | 54.7 ± 65.1  | 100        |                      |                    |                 |                |                   |                    |                  |                      |                 |                |              |                    |              |              |              |              |                     | <u>0.40</u>           | <u>-0.60</u>                          | <u>-0.21</u>   | <u>-0.51</u>     | <u>-0.65</u> | <u>-0.44</u>                         | <u>-0.54</u> | <u>-0.12</u> | <u>-0.14</u> | <u>-0.30</u> | <u>-0.63</u> | <u>-0.36</u> | <u>-0.25</u> |             |
| No. of bacteria (log) | 10.2 ± 0.4   | -          |                      |                    |                 |                |                   |                    |                  |                      |                 |                |              |                    |              |              |              |              |                     |                       | <u>-0.41</u>                          | <u>-0.49</u>   | <u>-0.46</u>     | <u>-0.49</u> | <u>-0.39</u>                         | <u>-0.45</u> | <u>-0.17</u> | <u>-0.51</u> | <u>-0.21</u> | <u>-0.46</u> | <u>-0.26</u> | <u>-0.21</u> |             |
| Sum (FL)              | 28.8 ± 28.2  | 100        |                      |                    |                 |                |                   |                    |                  |                      |                 |                |              |                    |              |              |              |              |                     |                       |                                       | <u>0.60</u>    | <u>0.62</u>      | <u>0.93</u>  | <u>0.74</u>                          | <u>0.82</u>  | <u>0.62</u>  | <u>0.56</u>  | <u>0.36</u>  | <u>0.67</u>  | <u>0.48</u>  | <u>0.32</u>  |             |
| Sum (LNT+LNnT)        | 3.5 ± 5.2    | 100        |                      |                    |                 |                |                   |                    |                  |                      |                 |                |              |                    |              |              |              |              |                     |                       |                                       |                | <u>0.48</u>      | <u>0.69</u>  | <u>0.36</u>                          | <u>0.59</u>  | <u>0.52</u>  | <u>0.84</u>  | <u>0.54</u>  | <u>0.51</u>  | <u>0.25</u>  | <u>0.39</u>  |             |
| Sum (LNFP+LNDFH)      | 24.7 ± 17.5  | 100        |                      |                    |                 |                |                   |                    |                  |                      |                 |                |              |                    |              |              |              |              |                     |                       |                                       |                |                  | <u>0.80</u>  | <u>0.26</u>                          | <u>0.61</u>  | <u>0.41</u>  | <u>0.50</u>  | <u>0.38</u>  | <u>0.90</u>  | <u>0.84</u>  | <u>0.73</u>  |             |
| Total HMO             | 57 ± 41.7    | 100        |                      |                    |                 |                |                   |                    |                  |                      |                 |                |              |                    |              |              |              |              |                     |                       |                                       |                |                  | <u>0.61</u>  | <u>0.83</u>                          | <u>0.57</u>  | <u>0.62</u>  | <u>0.49</u>  | <u>0.82</u>  | <u>0.63</u>  | <u>0.49</u>  |              |             |
| 2'-FL                 | 14.9 ± 20.8  | 78         |                      |                    |                 |                |                   |                    |                  |                      |                 |                |              |                    |              |              |              |              |                     |                       |                                       |                |                  |              |                                      | <u>0.45</u>  | <u>0.53</u>  | <u>0.28</u>  | <u>0.29</u>  | <u>0.26</u>  | <u>0.28</u>  | <u>0.01</u>  |             |
| 3-FL                  | 10 ± 13.2    | 96         |                      |                    |                 |                |                   |                    |                  |                      |                 |                |              |                    |              |              |              |              |                     |                       |                                       |                |                  |              |                                      |              | <u>0.40</u>  | <u>0.59</u>  | <u>0.13</u>  | <u>0.72</u>  | <u>0.43</u>  | <u>0.21</u>  |             |
| DFL                   | 3.9 ± 3.4    | 96         |                      |                    |                 |                |                   |                    |                  |                      |                 |                |              |                    |              |              |              |              |                     |                       |                                       |                |                  |              |                                      |              |              | <u>0.46</u>  | <u>0.39</u>  | <u>0.21</u>  | <u>0.54</u>  | <u>0.36</u>  |             |
| LNT                   | 3.2 ± 5.2    | 96         |                      |                    |                 |                |                   |                    |                  |                      |                 |                |              |                    |              |              |              |              |                     |                       |                                       |                |                  |              |                                      |              |              |              | <u>0.16</u>  | <u>0.53</u>  | <u>0.34</u>  | <u>0.24</u>  |             |
| LNnT                  | 0.4 ± 0.5    | 67         |                      |                    |                 |                |                   |                    |                  |                      |                 |                |              |                    |              |              |              |              |                     |                       |                                       |                |                  |              |                                      |              |              |              | <u>0.29</u>  | <u>0.31</u>  | <u>0.57</u>  |              |             |
| LNFP                  | 13.2 ± 8.9   | 100        |                      |                    |                 |                |                   |                    |                  |                      |                 |                |              |                    |              |              |              |              |                     |                       |                                       |                |                  |              |                                      |              |              |              |              | <u>0.61</u>  | <u>0.57</u>  |              |             |
| LNDFH I               | 8.2 ± 8.7    | 93         |                      |                    |                 |                |                   |                    |                  |                      |                 |                |              |                    |              |              |              |              |                     |                       |                                       |                |                  |              |                                      |              |              |              |              |              | <u>0.53</u>  |              |             |
| LNDFH II              | 3.3 ± 2.9    | 81         |                      |                    |                 |                |                   |                    |                  |                      |                 |                |              |                    |              |              |              |              |                     |                       |                                       |                |                  |              |                                      |              |              |              |              |              |              |              |             |

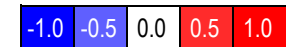

**Supplementary Fig. 10. Expanded correlation matrix for 27 1-month-old infants.** Spearman's rank correlations between the 10 most abundant bacterial families (average ≥1%), faecal pHs, organic acid concentrations, numbers of bacteria, and oligosaccharide concentration are shown numerically and in colour-scale. Underlining indicates p value < 0.05.

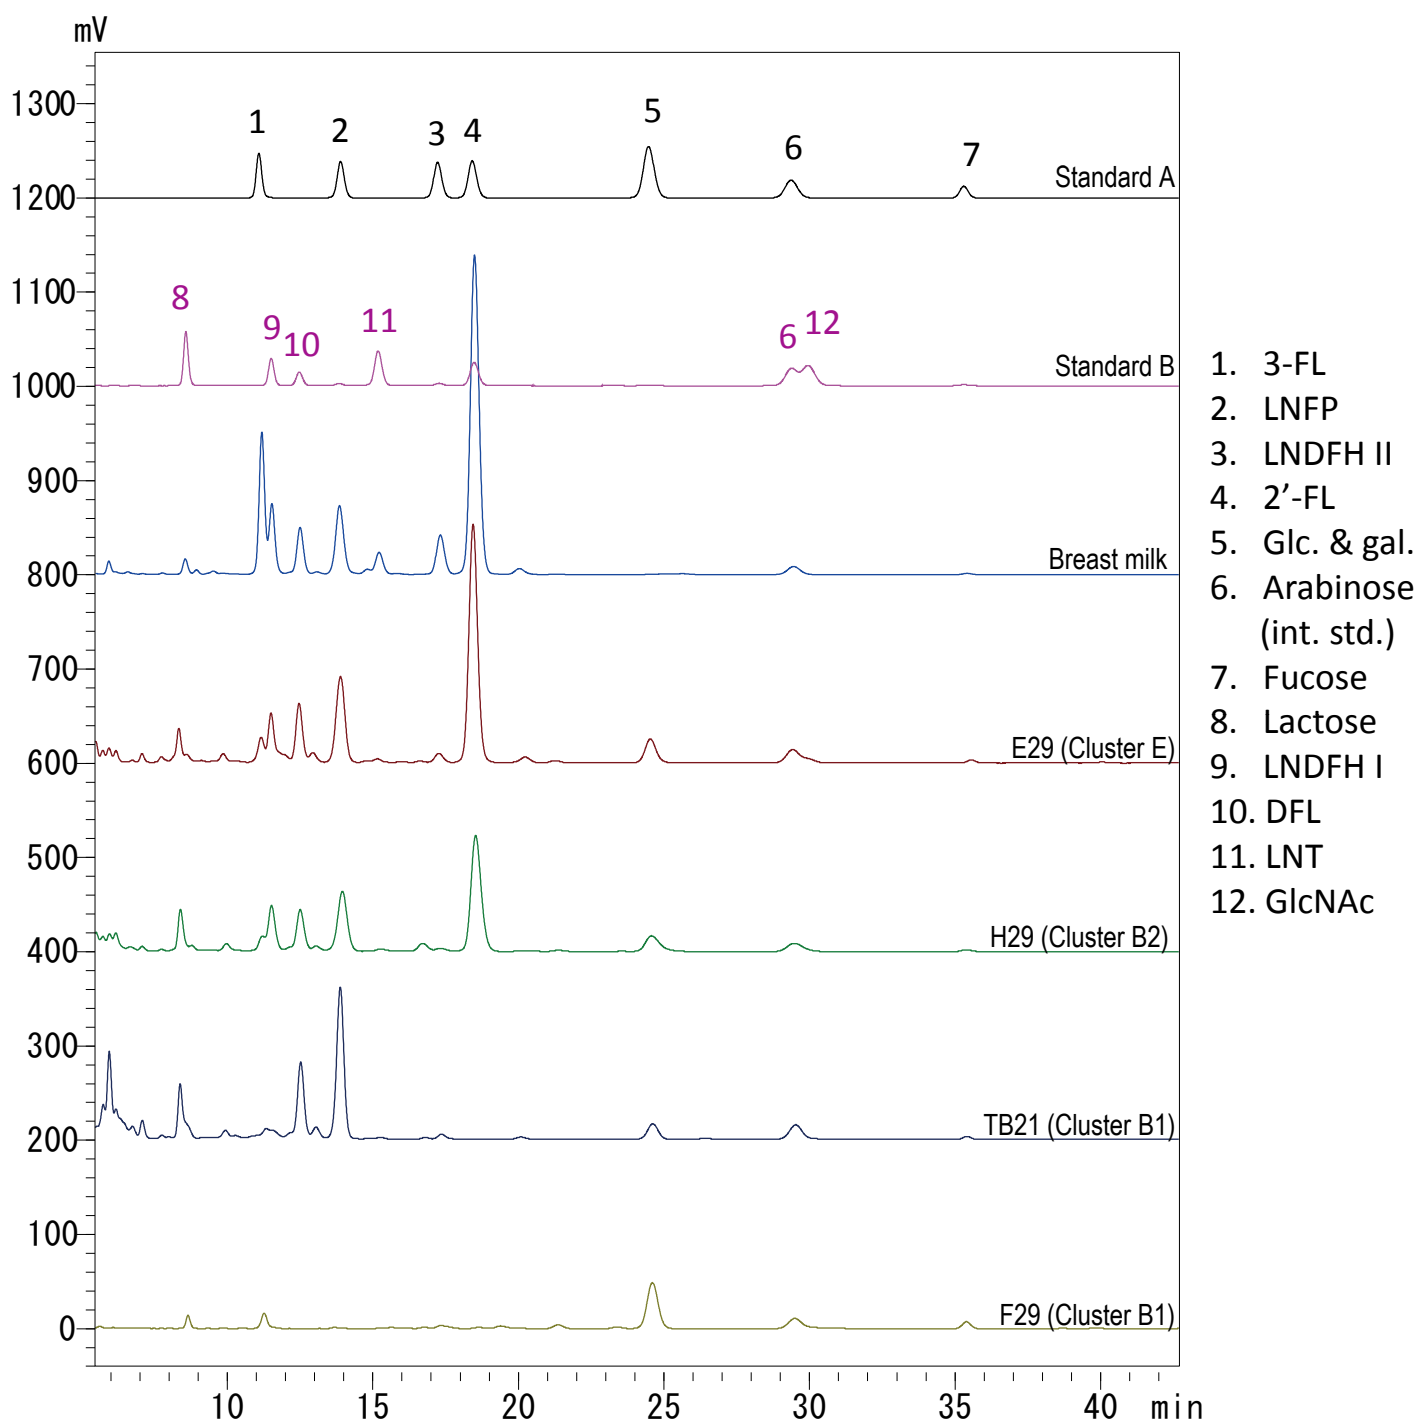

**Supplementary Fig. 11. HPLC profiles of the remaining HMOs in infant stool samples.** The sugars were labelled with ABEE and analysed by an HPLC instrument equipped with an L-column 2. Arabinose were used as an internal standard. The peaks were identified by comparing their retention times with those of the standard sugars (1–12).

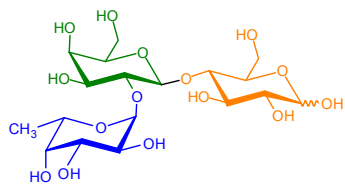

2'-fucosyllactose (2'-FL)

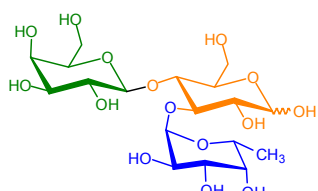

3-fucosyllactose (3-FL)

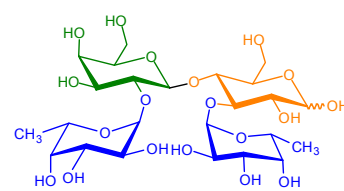

2', 3-difucosyllactose (DFL)

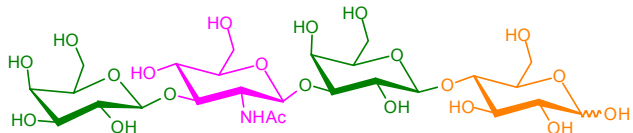

Lacto-N-tetraose (LNT)

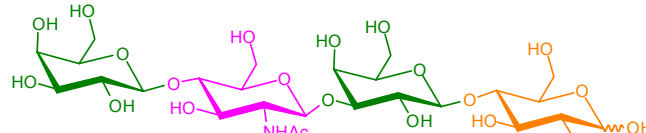

Lacto-N-neotetraose (LNnT)

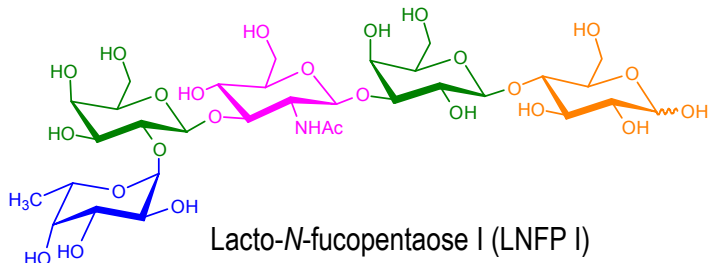

Lacto-N-fucopentaose I (LNFP I)

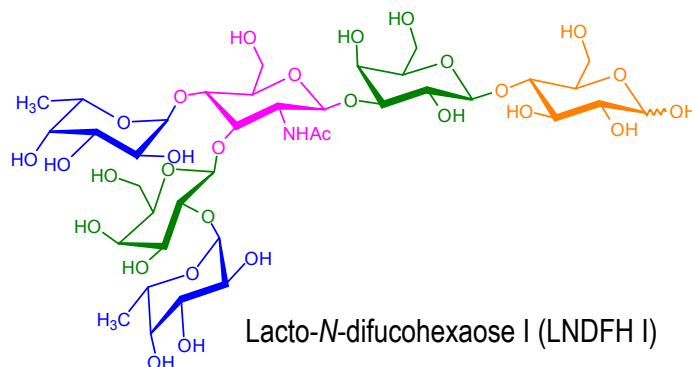

Lacto-N-difucohexaose I (LNDFH I)

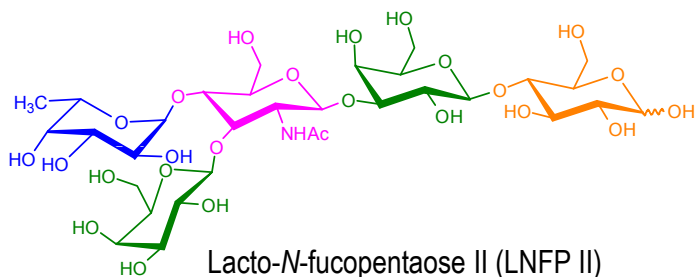

Lacto-N-fucopentaose II (LNFP II)

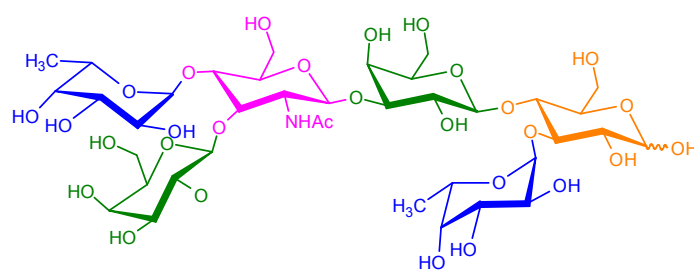

Lacto-N-difucohexaose II (LNDFH II)

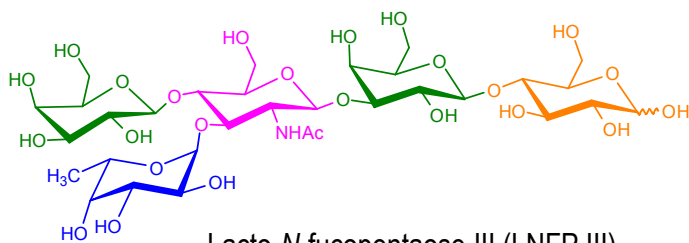

Lacto-N-fucopentaose III (LNFP III)

**Supplementary Fig. 12. Chemical structures of the major HMO components analysed in this study.**

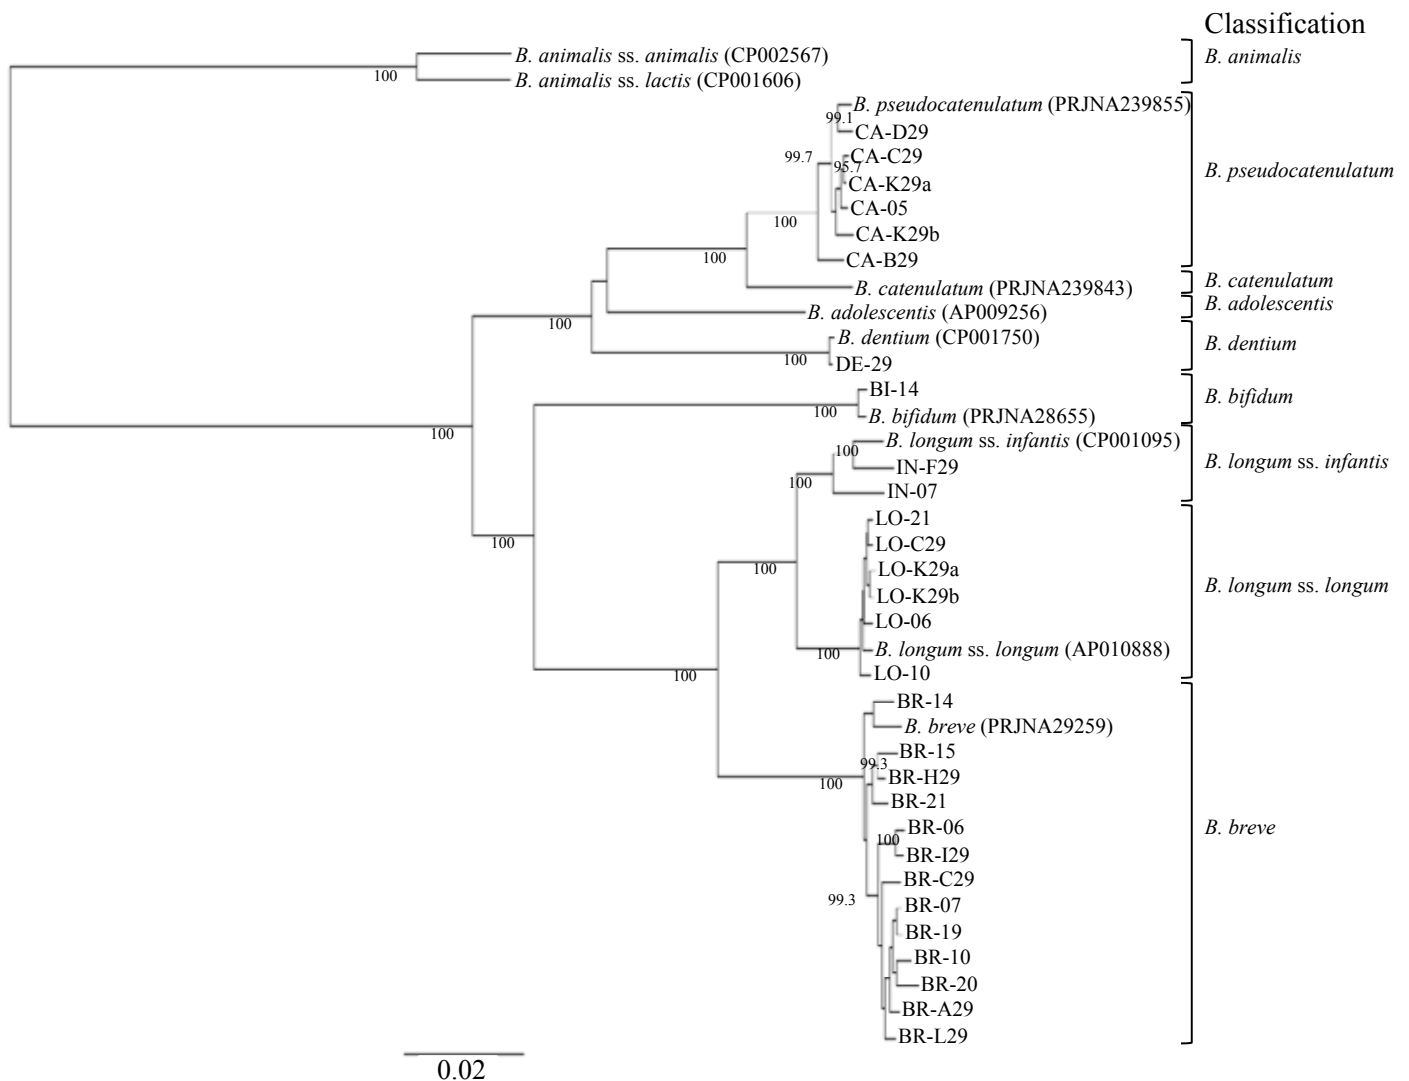

**Supplementary Fig. 13. Identification of *Bifidobacterium* strains based on multilocus sequence analysis (MLSA).** A phylogenetic tree of 29 isolated strains was computed from the concatenation of 16S rRNA, *clpC*, *fusA*, *groEL*, *gyrBI*, *purF*, and *xfp* gene sequences by the neighbour-joining method. GenBank accession numbers of the reference strains are given in parentheses. Bootstrap values of the phylogenetic tree were computed by resampling 1000 times, with values >95% shown in the branches.

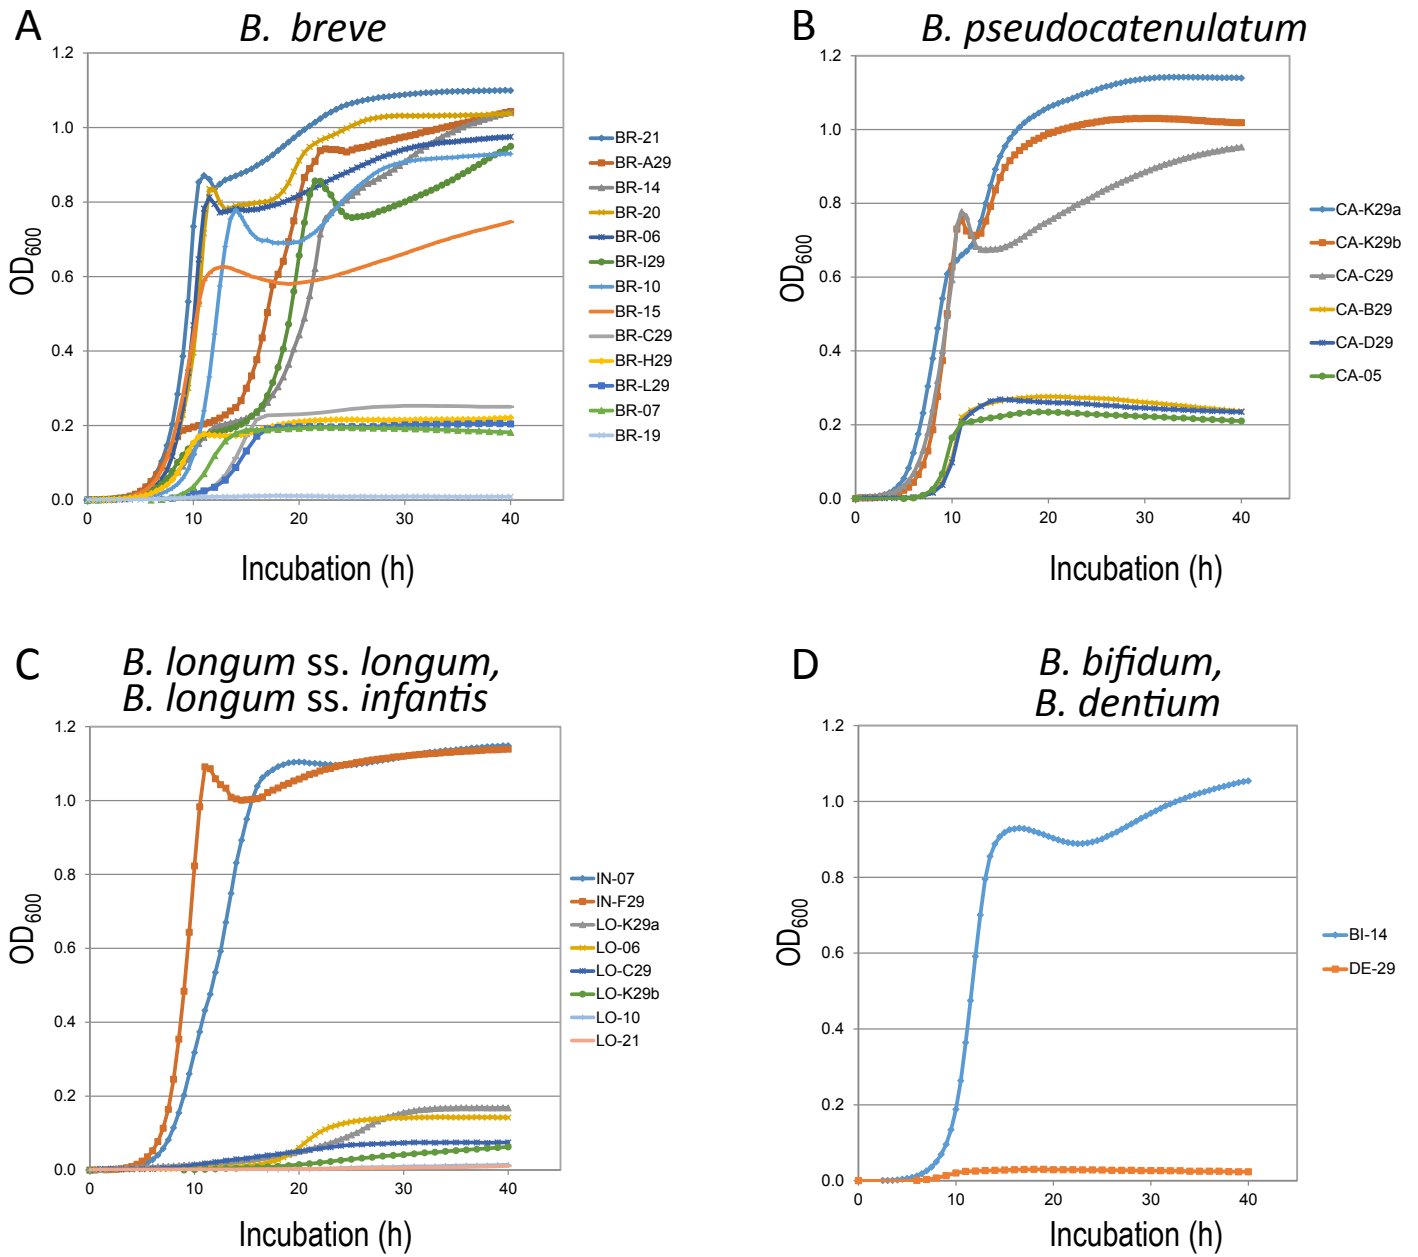

**Supplementary Fig. 14. Growth curves of 29 bifidobacterial strains in medium containing HMOs.**

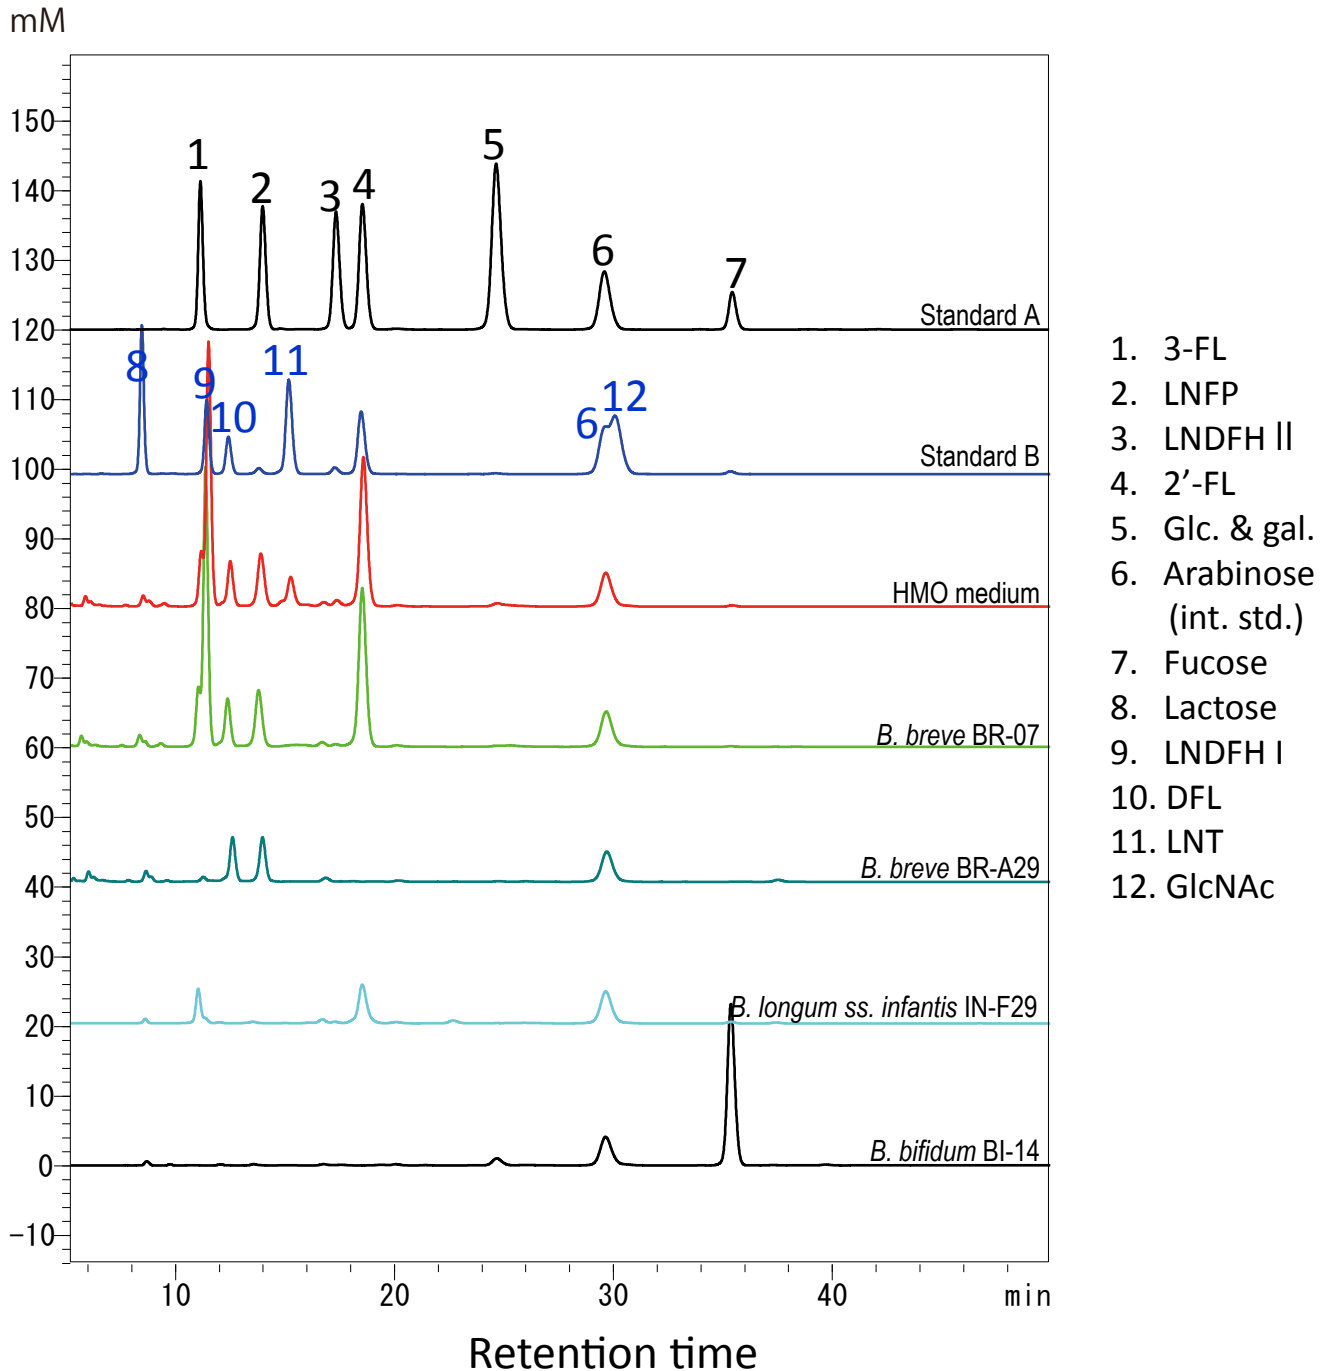

**Supplementary Fig. 15. HPLC profiles of the remaining HMOs in bacterial culture supernatants after 40 h.** The sugars were labelled with ABEE and analysed by HPLC. Arabinose was used as an internal standard. The peaks were identified by comparing their retention times with those of the standard sugars (1–12).

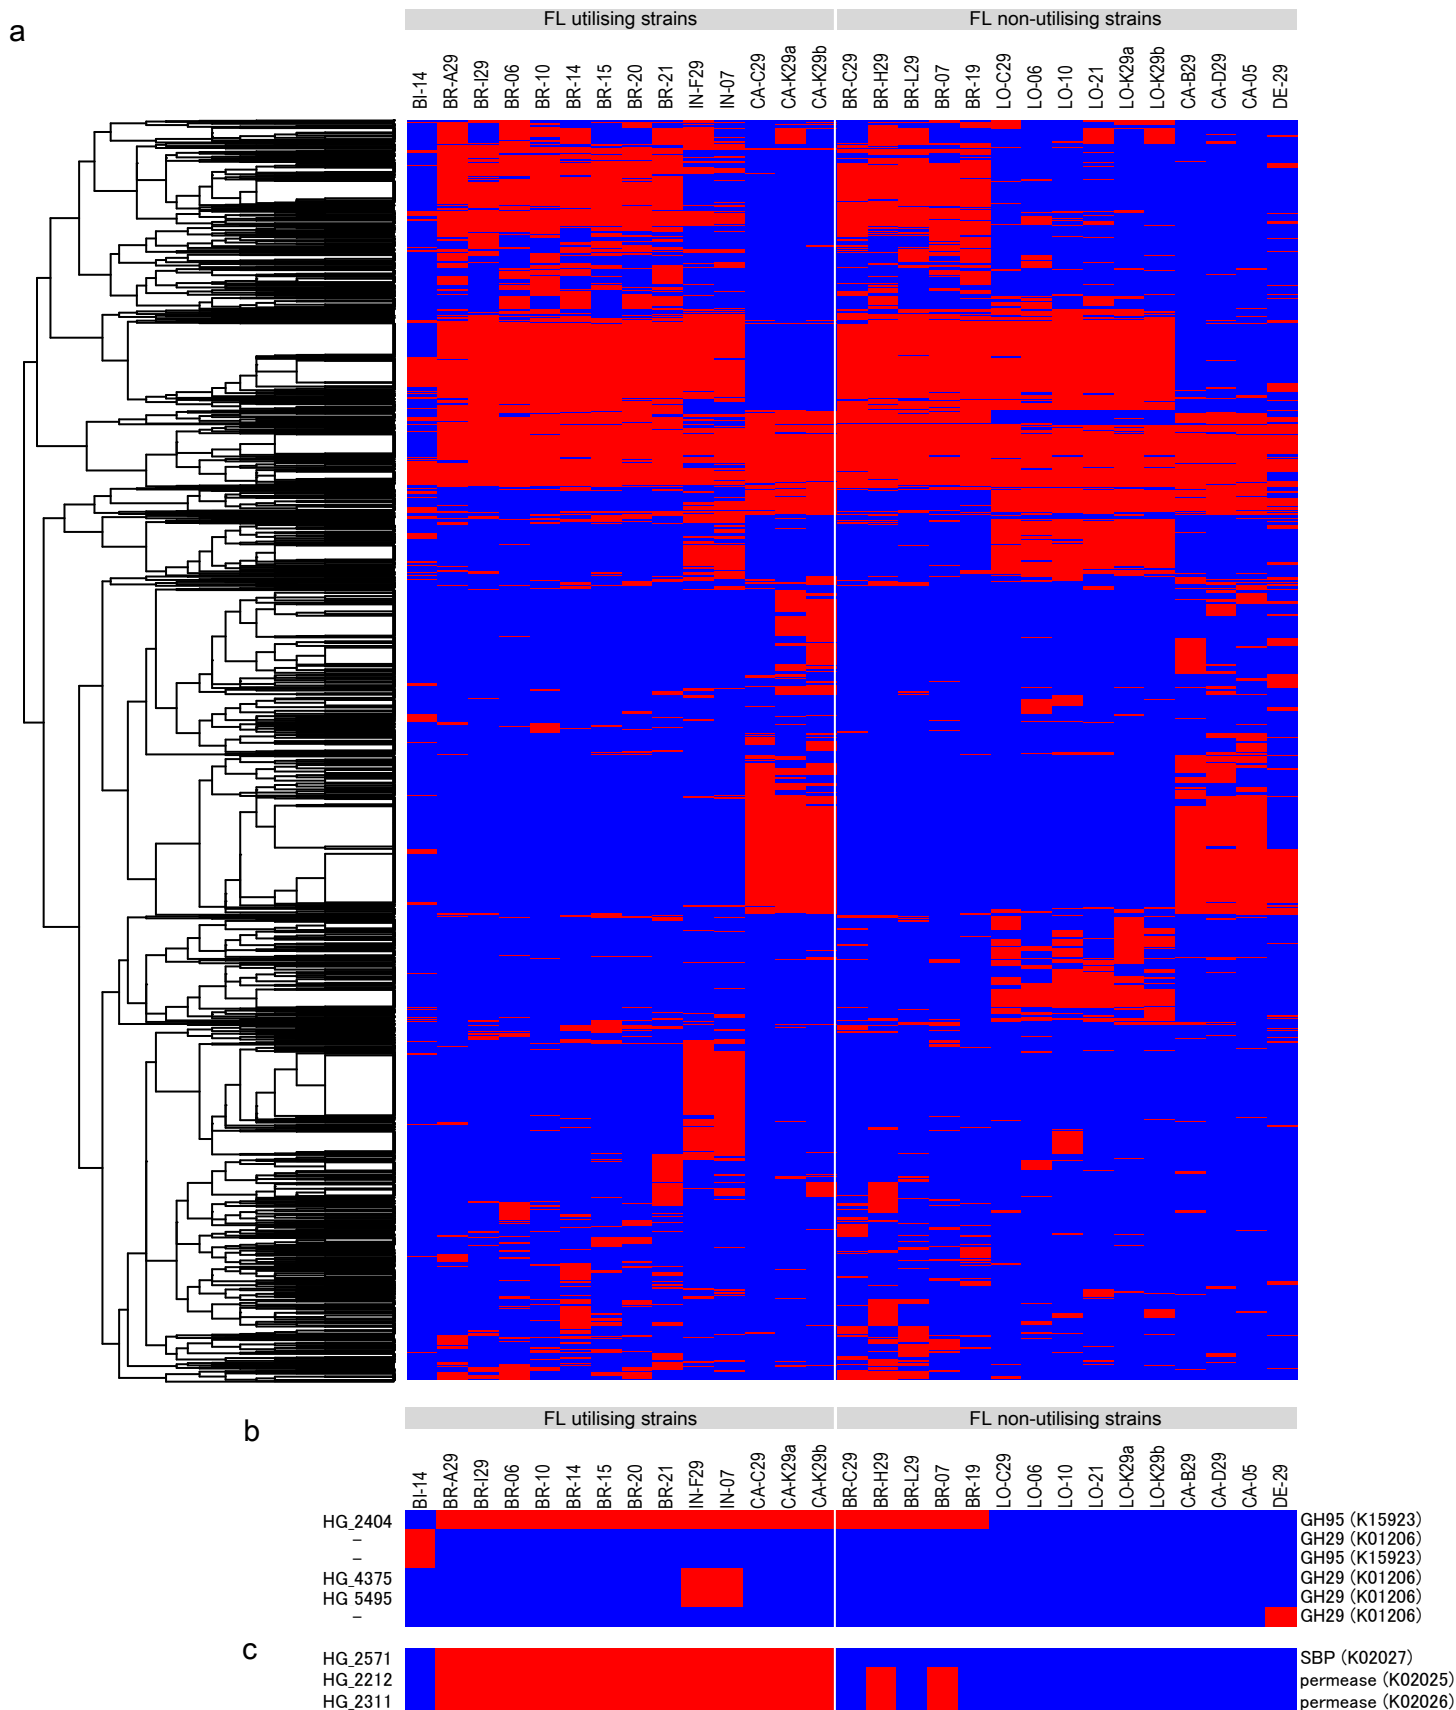

**Supplementary Fig. 16. OrthoMCL clustering of 29 bifidobacterial strains based on bi-directional BLASTP searches.**  
**a**, Among the 45,914 predicted genes of these strains, 4,690 homologous groups were identified, and their presence (red) or absence (blue) is shown. Similarity trees of OrthoMCL homologues (left) were computed based on the Euclidean distance of the homologue co-existent pattern. **b**, Distribution of homologous groups and a singleton assigned to fucosidases GH29 and GH95. **c**, Candidate genes responsible for FL utilisation. The presence of an homologous group (HG\_2571) corresponded with the FL-utilisation phenotype in most strains.



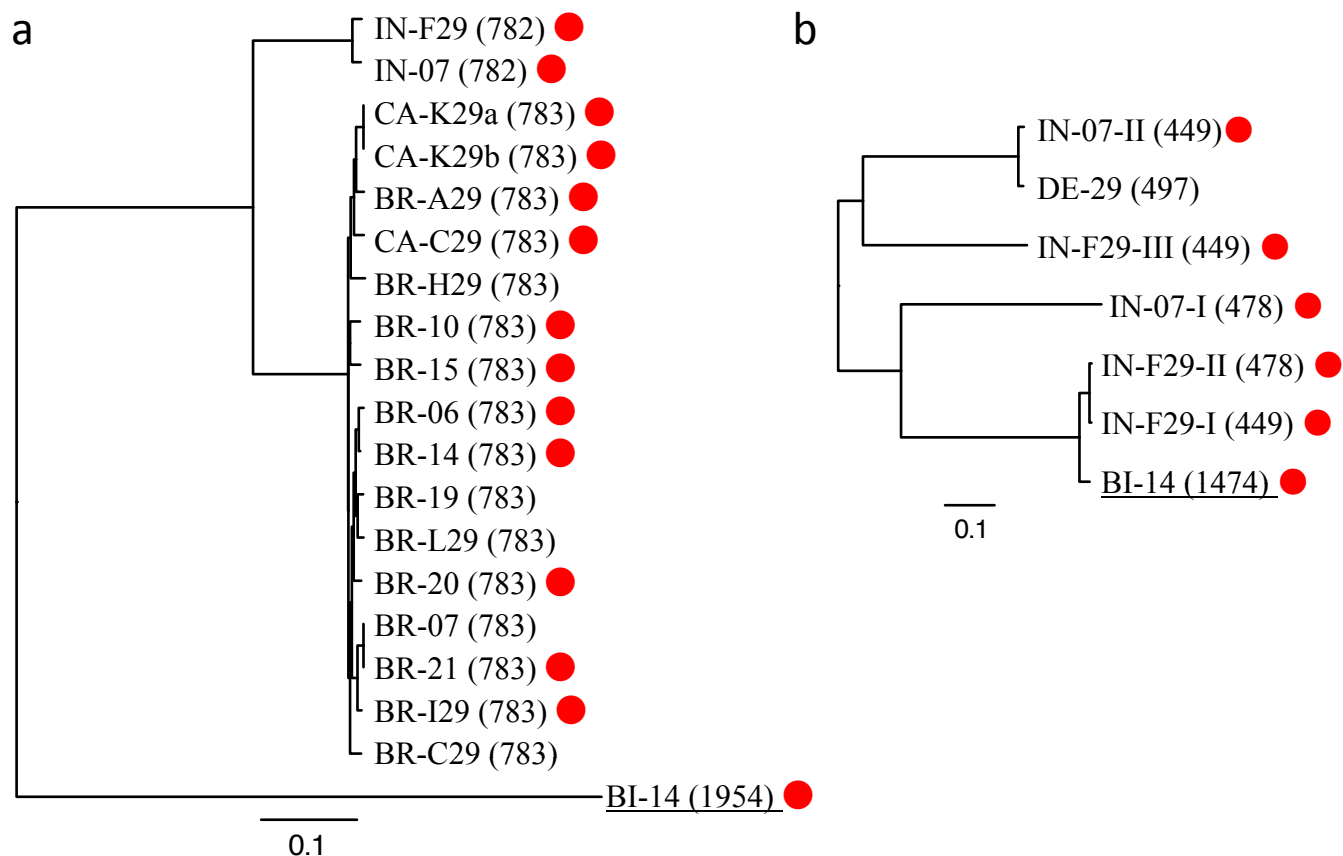

**Supplementary Fig. 17. Phylogenetic tree of fucosidases of the isolated bifidobacteria.** The strains labelled with a red circle are capable of utilising FL. The number in parenthesis represents the number of amino acids in the protein. Protein-localisation predictions suggested that most of these fucosidases are intracellular enzymes, except for the underlined fucosidase of the *B. bifidum* strain BI-14, which is predicted to be an extracellular membrane protein. **a**, Nineteen GH95 family genes found in 19 bifidobacterial strains. **b**, Seven GH29 family genes found in 3 strains. *B. longum* *ss. infantis* IN-F29 strain possess 3 GH29 genes (denoted as IN-F29-I, -II, and -III). IN-07 strain possess 2 fucosidase genes (IN-07-I and -II).

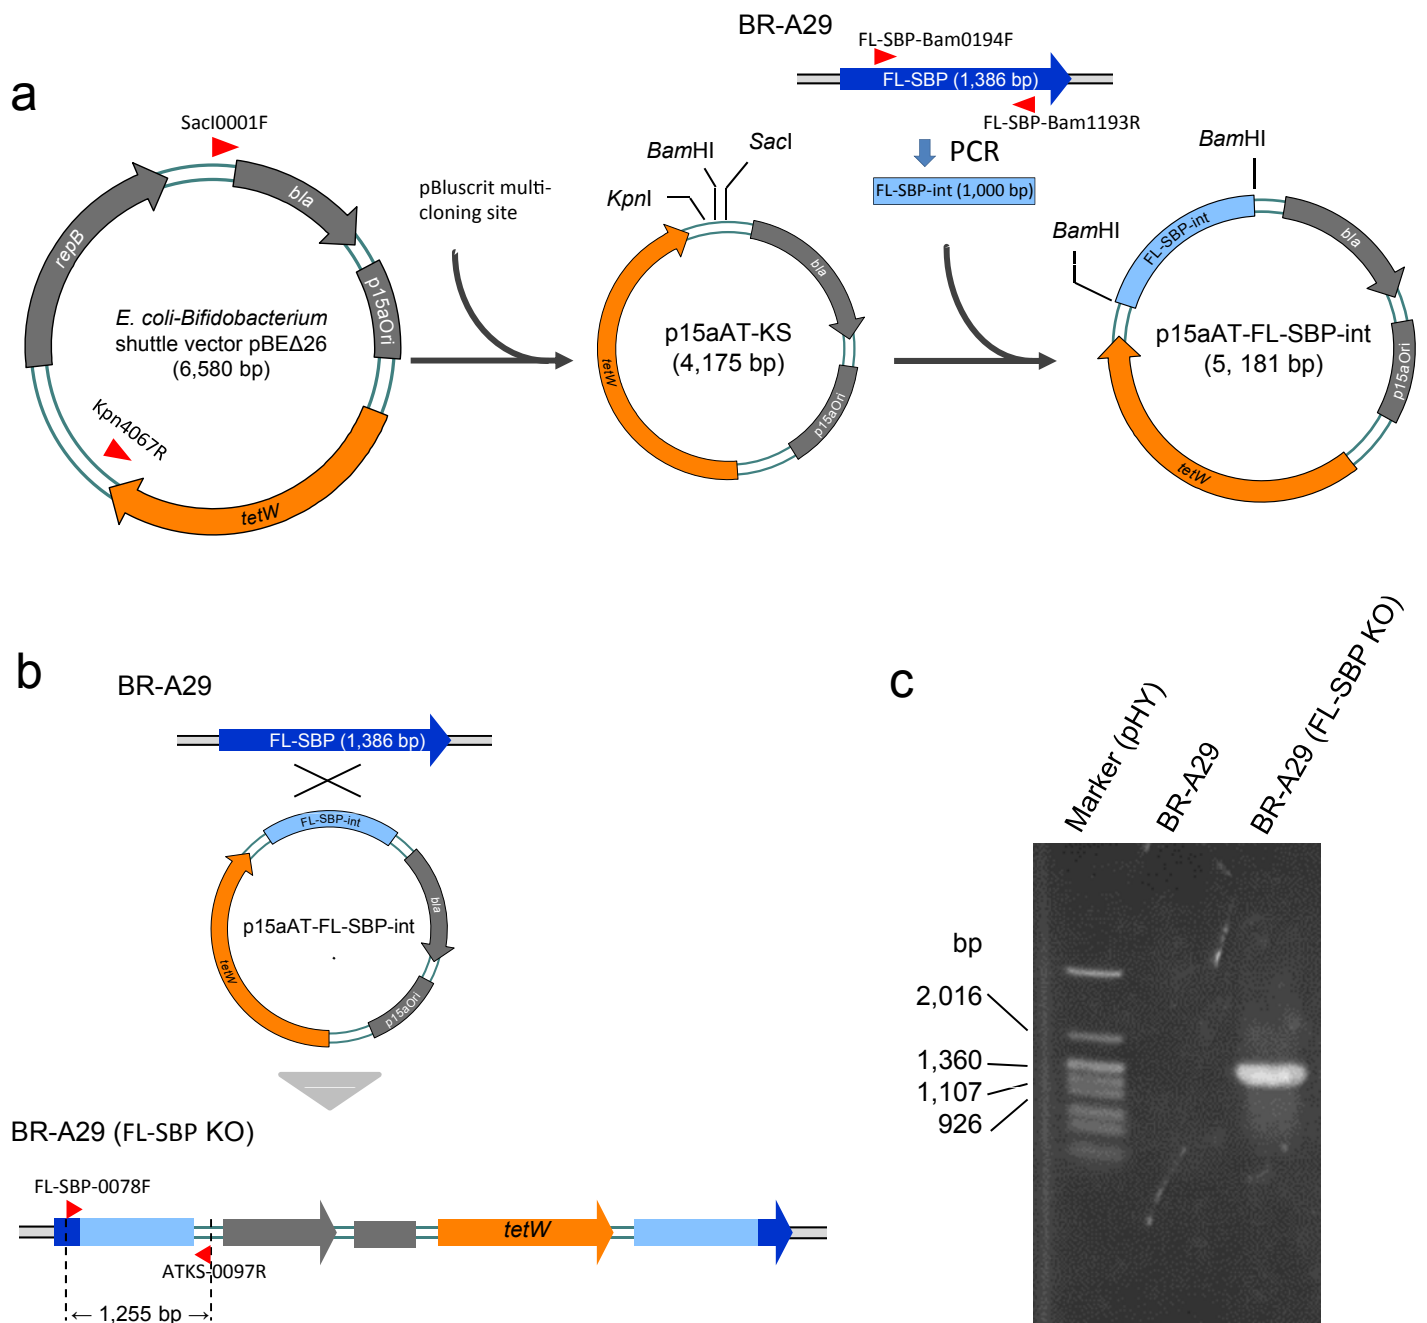

**Supplementary Fig. 18. Targeted knockout of FL-SBP in *B. breve* BR-A29 by insertional mutagenesis.**

**a**, DNA fragment was amplified from the *Escherichia coli* and *Bifidobacterium*-derived shuttle vector pBEΔ26 containing a p15A origin of replication (for *E. coli*) and the *bla* and *tetW* genes (for ampicillin and tetracycline resistance, respectively). The amplified fragment was digested with *SacI* and *KpnI* and ligated with multiple-cloning site of pBluescript II. An internal 1000-bp fragment of the FL-SBP gene (partial FL-SBP, denoted as ‘FL-SBP-int’) was inserted to construct the p15aAT-FL-SBP-int plasmid for insertional mutagenesis of the FL-SBP gene. **b**, Schematic representation of homologous recombination. **c**, The expected site-specific recombination event in a tetracycline-resistant mutant was confirmed by PCR with the FL-SBP-0078F and ATKS-0097R primers.

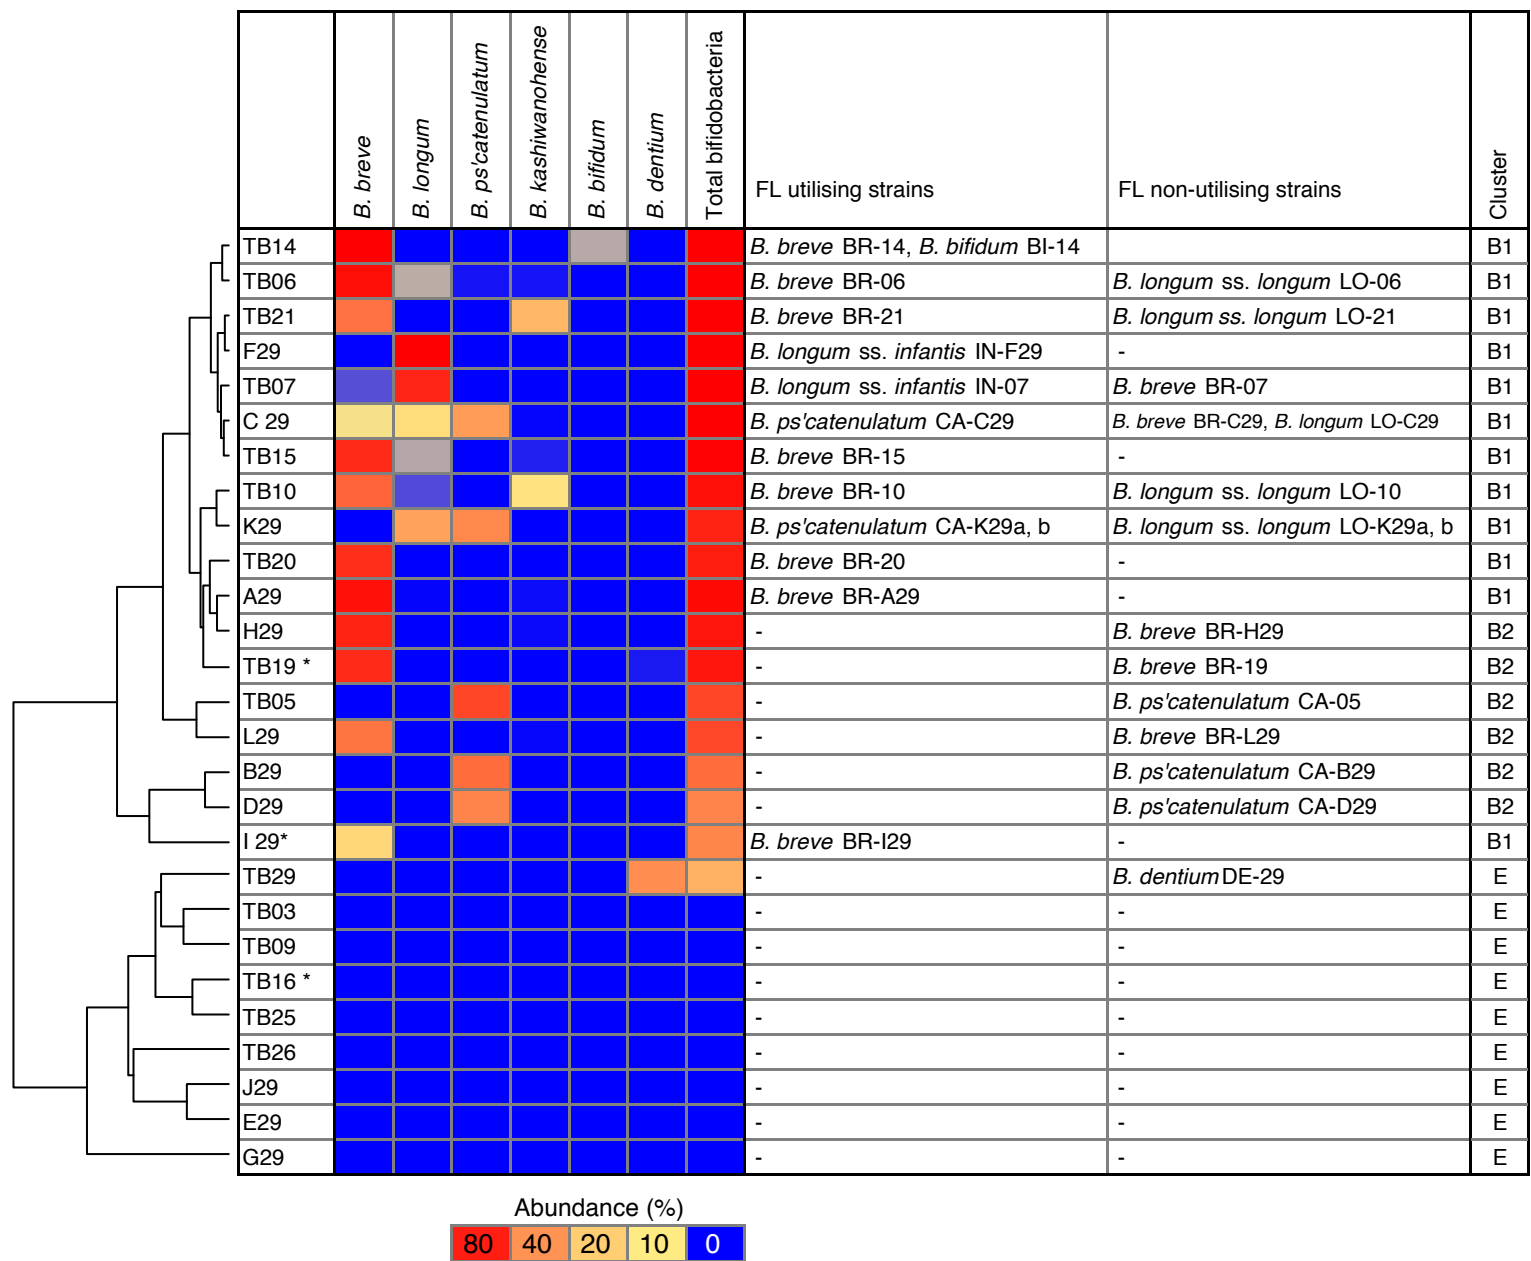

**Supplementary Fig. 19. Distribution of FL-utilising and FL-non-utilising bifidobacteria.**

Bifidobacterial abundances in 1-month-old infants (n = 27) were illustrated with heatmap at species level. The clusters to which the infants belong to are also indicated. Infants marked with an asterisks received breast milk from non-secretor mothers.

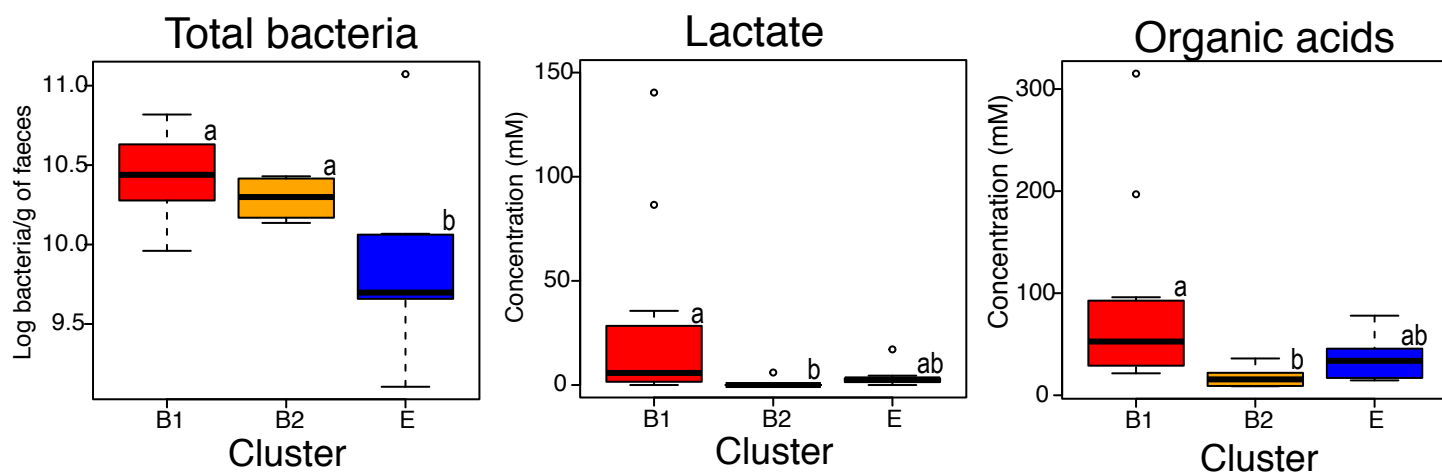

**Supplementary Fig. 20. Differences in gut environments among clusters B1, B2, and E.**

Different letters (a–c) above the boxes indicate significant differences between clusters ( $p < 0.05$ , Mann–Whitney U test with Bonferroni’s correction). Cluster B1, (FL-utilising Bifidobacteriaceae-predominant, red), cluster B2 (non-FL-utilising Bifidobacteriaceae-predominant, orange) and cluster E (Enterobacteriaceae-predominant, blue) were compared.

Supplementary Table 1. Relevant characteristics of infants in whom gut microbiota were investigated during the first month of life

| Subject ID | Delivery | Birth weight (g) | Sex | Gestation (wk) | Sibling | Feeding (% breast feeding) |                 |                |
|------------|----------|------------------|-----|----------------|---------|----------------------------|-----------------|----------------|
|            |          |                  |     |                |         | Formula (< 10%)            | Mixed (11-89%)  | Breast (> 90%) |
| A          | Vaginal  | 2,820            | M   | 40             | -       | days 0-3                   | days 4-12       | days 13-30     |
| B          | Vaginal  | 3,030            | F   | 40             | +       | days 0-2                   | days 3-7, 9-10  | days 8, 11-30  |
| C          | Vaginal  | 2,620            | M   | 39             | -       | days 0-1                   | -               | days 2-30      |
| D          | Vaginal  | 2,750            | F   | 38             | +       | day 0                      | days 1, 2, 4-15 | days 3, 16-30  |
| E          | Vaginal  | 2,544            | F   | 40             | -       | -                          | -               | days 0-30      |
| F          | Vaginal  | 2,706            | M   | 38             | -       | -                          | days 5-7        | days 0-4, 8-30 |
| G          | Vaginal  | 2,525            | M   | 38             | -       | -                          | days 13-30      | days 0-12      |
| H          | Vaginal  | 2,935            | M   | 38             | +       | -                          | -               | days 0-30      |
| I          | Vaginal  | 2926             | M   | 40             | -       | days 0-2                   | day 3           | days 4-30      |
| J          | Vaginal  | 3178             | F   | 38             | +       | day 1                      | days 2,3        | days 4-30      |
| K          | Vaginal  | 3092             | F   | 38             | +       | -                          | days 1-3        | days 4-30      |
| L          | Vaginal  | 2960             | M   | 39             | +       | -                          | -               | days 0-30      |

Supplementary Table 2. Infant volunteers, samples analysed, and the number of 454 reads per sample

|        | Infant volunteers (n = 12) |        |        |        |        |        |        |        |        |        |        |        |
|--------|----------------------------|--------|--------|--------|--------|--------|--------|--------|--------|--------|--------|--------|
|        | A                          | B      | C      | D      | E      | F      | G      | H      | I      | J      | K      | L      |
| Day 1  | -                          | 1,489  | 2,146  | 1,471  | 1,195  | -      | NT     | NT     | NT     | -      | NT     | NT     |
| Day 2  | 2,716                      | 2,134  | 1,857  | 1,460  | 1,364  | 1,847  | NT     | 4,070  | NT     | 4,615  | 3,344  | NT     |
| Day 3  | 1,767                      | 1,903  | 1,826  | 1,135  | 1,138  | 2,578  | -      | 4,245  | 3,435  | 5,331  | 3,711  | 5,421  |
| Day 4  | 1,455                      | 1,870  | 1,890  | 2,253  | 3,921  | 1,627  | NT     | 3,617  | 4,427  | -      | 3,720  | 4,935  |
| Day 5  | 1,981                      | 1,564  | 1,660  | 2,015  | 2,605  | 1,319  | 4,406  | 4,793  | 2,577  | 4,210  | 3,780  | 7,476  |
| Day 6  | 1,289                      | 2,101  | 1,825  | 2,029  | 1,069  | 1,357  | 4,049  | 3,789  | 3,730  | 3,816  | 3,892  | 3,763  |
| Day 7  | 1,408                      | 2,658  | 2,160  | 1,859  | 1,440  | 1,286  | 4,670  | 3,835  | 3,387  | 4,424  | 3,464  | 3,720  |
| Day 9  | 1,818                      | 2,475  | 1,925  | 1,668  | 1,379  | 1,547  | 5,137  | 3,460  | 3,594  | 5,506  | 5,698  | 4,172  |
| Day 11 | 3,059                      | 2,953  | 1,801  | 2,474  | 2,252  | 1,309  | 4,185  | 3,820  | 3,796  | 4,126  | 4,217  | 3,690  |
| Day 13 | 2,312                      | 3,226  | 3,150  | 3,110  | 2,335  | 1,875  | 4,211  | 4,803  | 3,502  | 5,219  | 4,075  | 3,465  |
| Day 15 | 2,528                      | 2,867  | 2,370  | 1,330  | 2,023  | 1,143  | 2,895  | 4,126  | 2,529  | 4,863  | 4,374  | 8,381  |
| Day 17 | 2,684                      | 2,570  | 1,519  | 1,104  | 1,704  | 1,261  | 2,953  | 3,800  | 3,318  | 4,711  | 4,878  | 4,903  |
| Day 19 | 1,990                      | 1,817  | 2,517  | 1,293  | 1,432  | 1,430  | 2,009  | 3,876  | 4,479  | 3,734  | 4,602  | 5,344  |
| Day 21 | 3,024                      | 2,621  | 1,772  | 1,303  | 1,945  | 1,356  | 1,954  | 4,041  | 4,633  | 3,536  | 3,968  | 3,400  |
| Day 23 | 2,556                      | 2,671  | 1,214  | 1,079  | 1,286  | 1,783  | 2,799  | 4,100  | 5,070  | 4,514  | 4,131  | 5,853  |
| Day 25 | 2,711                      | 1,067  | 1,505  | 1,118  | 1,432  | 1,080  | 2,367  | 2,362  | 3,488  | 4,125  | 4,347  | 2,274  |
| Day 27 | 2,982                      | 1,594  | 1,610  | 1,483  | 1,467  | 1,248  | 1,898  | 2,330  | 3,580  | 3,897  | 3,642  | 8,124  |
| Day 29 | 2,330                      | 1,991  | 1,388  | 1,249  | 1,558  | 1,596  | 2,394  | 3,067  | 3,436  | 4,005  | 3,976  | 4,870  |
| Total  | 38,610                     | 39,571 | 34,135 | 29,433 | 31,545 | 25,642 | 45,927 | 64,134 | 58,981 | 70,632 | 69,819 | 79,791 |
| Means  | 2,271                      | 2,198  | 1,896  | 1,635  | 1,753  | 1,508  | 3,281  | 3,773  | 3,686  | 4,415  | 4,107  | 4,987  |

-, Sample not provided. NT, not tested since PCR product was not obtained with 40 cycle PCR

Supplementary Table 3. Analysis workflow and QIIME parameter settings used in this study

| QIIME and Unix command <sup>a</sup>     | Options                                                                                                                                          |
|-----------------------------------------|--------------------------------------------------------------------------------------------------------------------------------------------------|
| split_libraries.py <sup>b</sup>         | -m MAP##.txt -f RunFile##.fna -q RunFile##.qual -l 200 -L350 -s 25 -a 0 -M 2 -e 1 -w 100 -b 10 -z disable --max-homopolymer 10 -o Run##/seqs.fna |
| truncate_reverse_primer.py <sup>b</sup> | -f Run##/seqs.fna -z truncate_remove -m SeqData/MAP##.txt -o Run##/<br>--primer_mismatches 2                                                     |
| cp <sup>b</sup>                         | Run##/seqs_rev_primer_truncated.fna seqs.Run##.fna                                                                                               |
| cat                                     | *.fna > seqs.fna                                                                                                                                 |
| pick_otus.py                            | -i seqs.fna -m usearch --db_filepath=/QIIME_database/gold_fa.fasta -g 2<br>--suppress_de_novo_chimera_detection                                  |
| pick_rep_set.py                         | -f seqs.fna -i usearch_picked_otus/seqs_otus.txt -m most_abundant                                                                                |
| align_seqs.py                           | -i seqs.fna_rep_set.fasta -m muscle                                                                                                              |
| make_phylogeny.py                       | -i muscle_aligned/seqs.fna_rep_set_aligned.fasta -o rep_phylo.tre                                                                                |
| assign_taxonomy.py                      | -i seqs.fna_rep_set.fasta -m rdp -c 0.5                                                                                                          |
| make_otu_table.py                       | -i usearch_picked_otus/seqs_otus.txt -t<br>rdp_assigned_taxonomy/seqs.fna_rep_set_tax_assignments.txt -o otu_table.biom                          |
| biom summarize-table                    | -i otu_table.biom -o reads_per_sample.txt                                                                                                        |
| make_otu_heatmap_html.py                | -i otu_table.biom -o otus/OTU_Heatmap/ -n 1 -m MAP.txt                                                                                           |
| summarize_taxa.py                       | -i otu_table.biom -o wf_taxa_summary/                                                                                                            |
| plot_taxa_summary.py                    | -i wf_taxa_summary/otu_table_L5.txt -l Family -o graph_family -c bar --<br>include_html_counts                                                   |
| multiple_rarefactions.py                | -i otu_table.biom -o wf_arare/rarefaction/ --min 20 --max 5000 --num-reps 40 --step 20                                                           |
| alpha_diversity.py                      | -i wf_arare/rarefaction/ -m chao1,PD_whole_tree,observed_species,shannon -o<br>wf_arare/alpha_div/ -t rep_phylo.tre                              |
| collate_alpha.py                        | -i wf_arare/alpha_div/ -o wf_arare/alpha_div_collated/                                                                                           |
| make_rarefaction_plots.py               | -i wf_arare/alpha_div_collated/ -m MAP.txt -o alpha_diversity_html                                                                               |
| single_rarefaction.py                   | -i otu_table.biom -o otus/otu_table_beta.biom -d 1000                                                                                            |
| make_prefs_file.py                      | -m MAP.txt -o prefs_out.txt                                                                                                                      |

<sup>a</sup> MacQIIME version 1.8.0 (<http://www.wernerlab.org/software/macqiime>) was used in this study.

<sup>b</sup> These commands were used for each 454-run file.

Supplementary Table 4. Relevant characteristics of infants in whom gut microbiota were investigated at approximately 1 month after birth

| ID <sup>a</sup> | Delivery | Birth weight (g) | Sex | Gestation (wk) | Sibling | Feeding |
|-----------------|----------|------------------|-----|----------------|---------|---------|
| A29             | Vaginal  | 2,820            | M   | 40             | -       | Breast  |
| B29             | Vaginal  | 3,030            | F   | 40             | +       | Breast  |
| C29             | Vaginal  | 2,620            | M   | 39             | -       | Breast  |
| D29             | Vaginal  | 2,750            | F   | 38             | +       | Breast  |
| E29             | Vaginal  | 2,544            | F   | 40             | -       | Breast  |
| F29             | Vaginal  | 2,706            | M   | 38             | -       | Breast  |
| G29             | Vaginal  | 2,525            | M   | 38             | -       | Breast  |
| H29             | Vaginal  | 2,935            | M   | 38             | +       | Breast  |
| I29             | Vaginal  | 2,926            | M   | 40             | -       | Breast  |
| J29             | Vaginal  | 3,178            | F   | 38             | +       | Breast  |
| K29             | Vaginal  | 3,092            | F   | 38             | +       | Breast  |
| L29             | Vaginal  | 2,960            | M   | 39             | +       | Breast  |
| TB03            | Vaginal  | 3,454            | M   | 40             | -       | Breast  |
| TB05            | Vaginal  | 3,356            | M   | 38             | -       | Breast  |
| TB06            | Vaginal  | 3,125            | M   | 39             | +       | Breast  |
| TB07            | Vaginal  | 2,386            | M   | 34             | +       | Breast  |
| TB09            | Vaginal  | 3,132            | F   | 41             | -       | Breast  |
| TB10            | Vaginal  | 3,530            | M   | 40             | +       | Breast  |
| TB14            | Vaginal  | 2,866            | M   | 40             | +       | Breast  |
| TB15            | Vaginal  | 2,500            | M   | 37             | +       | Breast  |
| TB16            | Vaginal  | 2,592            | F   | 39             | -       | Breast  |
| TB19            | Vaginal  | 3,334            | M   | 39             | -       | Breast  |
| TB20            | Vaginal  | 3,256            | M   | 40             | +       | Breast  |
| TB21            | Vaginal  | 3,784            | M   | 39             | +       | Breast  |
| TB25            | Vaginal  | 2,946            | F   | 37             | +       | Breast  |
| TB26            | Vaginal  | 2,770            | F   | 40             | -       | Breast  |
| TB29            | Vaginal  | 2,414            | F   | 37             | -       | Breast  |

<sup>a</sup> The subject background information of 12 infants (A to L) is shown for comparison purposes here, as well as in Supplementary Table 1. "TB" is the ID of this follow-up cohort, and the numbers are sequential serial numbers. In the follow-up cohort, 30 infants were recruited, and 15 exclusively breast-fed infants were selected for the analysis.



Supplementary Table 5. Sample IDs, ages, and family relationships of the 22 adult volunteers

| Infant ID | Father |     | Mother |     |
|-----------|--------|-----|--------|-----|
|           | ID     | Age | ID     | Age |
| A         | faA    | 42  | moA    | 41  |
| B         | faB    | 43  | moB    | 42  |
| C         | faC    | 29  | -      | -   |
| D         | faD    | 36  | moD    | 33  |
| E         | faE    | 33  | moE    | 31  |
| F         | faF    | 31  | moF    | 29  |
| G         | faG    | 33  | -      | -   |
| H         | faH    | 29  | moH    | 30  |
| I         | faI    | 31  | moI    | 30  |
| J         | faJ    | 31  | moJ    | 31  |
| K         | faK    | 34  | moK    | 34  |
| L         | faL    | 35  | moL    | 33  |

-, sample not provided.

Supplementary Table 6. Concentration of HMO component in breast milk (mM).

| Infant Subject ID | 2'-FL | 3-FL | DF-L | LNT | LNnT | LNFP | LNDFH I | LNDFH II |
|-------------------|-------|------|------|-----|------|------|---------|----------|
| A29               | 5.6   | 0.9  | 0.3  | 2.1 | 0.8  | 2.6  | 1.2     | 0.0      |
| B29               | 3.1   | 0.7  | 0.2  | 0.7 | 5.2  | 1.0  | 0.3     | 0.1      |
| C29               | 4.5   | 1.0  | 0.4  | 0.8 | 9.5  | 1.3  | 0.8     | 0.4      |
| D29               | 4.2   | 0.8  | 0.3  | 0.7 | 8.6  | 1.1  | 0.5     | 0.2      |
| E29               | 5.8   | 1.0  | 0.6  | 0.5 | 8.7  | 1.2  | 0.7     | 0.2      |
| F29               | 4.3   | 1.2  | 0.4  | 0.4 | 3.4  | 0.8  | 0.5     | 0.3      |
| G29               | 5.6   | 1.1  | 0.5  | 0.4 | 3.5  | 1.2  | 0.5     | 0.5      |
| H29               | 4.3   | 1.1  | 0.3  | 0.7 | 11.1 | 1.1  | 0.7     | 0.4      |
| I29               | 0.0   | 2.5  | 0.0  | 1.4 | 3.4  | 1.4  | 0.0     | 0.1      |
| J29               | 6.1   | 0.5  | 0.4  | 0.7 | 5.8  | 2.2  | 0.8     | 0.5      |
| K29               | 2.9   | 1.7  | 0.4  | 1.1 | 5.1  | 1.4  | 1.1     | 0.2      |
| L29               | 5.7   | 1.2  | 0.7  | 0.5 | 6.9  | 1.3  | 0.8     | 0.2      |
| TB03              | 4.0   | 0.9  | 0.3  | 0.6 | 4.3  | 1.2  | 0.7     | 0.0      |
| TB05              | 4.5   | 1.0  | 0.3  | 0.3 | 12.5 | 0.7  | 0.3     | 0.1      |
| TB06              | 2.4   | 1.1  | 0.2  | 1.0 | 3.4  | 1.3  | 0.6     | 0.0      |
| TB07              | 4.0   | 1.5  | 0.4  | 0.7 | 9.7  | 1.1  | 0.7     | 0.2      |
| TB09              | 4.6   | 1.6  | 0.6  | 0.3 | 4.1  | 1.0  | 0.6     | 0.0      |
| TB10              | 3.8   | 1.3  | 0.4  | 0.7 | 10.9 | 1.1  | 0.8     | 0.2      |
| TB14              | 2.1   | 1.9  | 0.3  | 0.4 | 4.3  | 0.7  | 0.3     | 0.0      |
| TB15              | 3.5   | 3.1  | 0.4  | 0.5 | 20.6 | 0.9  | 0.4     | 0.1      |
| TB16              | 0.0   | 2.0  | 0.0  | 2.5 | 8.9  | 1.4  | 0.0     | 0.1      |
| TB19              | 0.0   | 5.0  | 0.0  | 1.0 | 6.0  | 1.8  | 0.0     | 0.0      |
| TB20              | 3.4   | 1.7  | 0.5  | 0.7 | 6.2  | 1.2  | 0.9     | 0.1      |
| TB21              | 2.9   | 2.4  | 0.4  | 0.5 | 12.8 | 0.8  | 0.3     | 0.1      |
| TB25              | 4.0   | 1.3  | 0.7  | 1.1 | 6.8  | 1.7  | 1.2     | 0.3      |
| TB26              | 2.7   | 2.5  | 0.4  | 0.4 | 8.3  | 0.8  | 0.3     | 0.1      |
| TB29              | 3.4   | 2.1  | 0.4  | 0.7 | 9.9  | 1.1  | 0.7     | 0.2      |

Supplementary Table 7. Summary of the draft genome of 29 bifidobacterial strains, their utilisation of fucosyllactose, the presence of genes involved in FL utilisation, and their accession numbers <sup>a</sup>.

| No. | Strains                                     | Genome size (Mbp) | No. of CDSs | Value      |                   |                         | Isolated from | Growth in HMO medium (OD <sub>600</sub> > 0.7) | α-L-fucosidase |                | SBP            | Accession no. |              |
|-----|---------------------------------------------|-------------------|-------------|------------|-------------------|-------------------------|---------------|------------------------------------------------|----------------|----------------|----------------|---------------|--------------|
|     |                                             |                   |             | No. Contig | Max contig (kbp): | N50 <sup>b</sup> (kbp): |               |                                                | Coverage       | GH29           | GH95           |               | HG_2571      |
| 1   | <i>B. breve</i> BR-06                       | 2.7               | 2304        | 101        | 266               | 82                      | 100x          | TB06                                           | +              | -              | +              | +             | BCXL01000000 |
| 2   | <i>B. breve</i> BR-07                       | 2.2               | 1955        | 27         | 471               | 339                     | 70x           | TB07                                           | -              | -              | +              | -             | BCXM01000000 |
| 3   | <i>B. breve</i> BR-10                       | 2.3               | 2005        | 60         | 265               | 111                     | 60x           | TB10                                           | +              | -              | +              | +             | BCXN01000000 |
| 4   | <i>B. breve</i> BR-14                       | 2.5               | 2315        | 57         | 223               | 117                     | 70x           | TB14                                           | +              | -              | +              | +             | BCXO01000000 |
| 5   | <i>B. breve</i> BR-15                       | 2.4               | 2078        | 27         | 408               | 165                     | 80x           | TB15                                           | +              | -              | +              | +             | BCXP01000000 |
| 6   | <i>B. breve</i> BR-19                       | 2.3               | 2012        | 15         | 575               | 334                     | 100x          | TB19                                           | -              | -              | +              | -             | BCXQ01000000 |
| 7   | <i>B. breve</i> BR-20                       | 2.3               | 2039        | 52         | 233               | 115                     | 100x          | TB20                                           | +              | -              | +              | +             | BCXR01000000 |
| 8   | <i>B. breve</i> BR-21                       | 2.6               | 2368        | 66         | 311               | 116                     | 170x          | TB21                                           | +              | -              | +              | +             | BCXS01000000 |
| 9   | <i>B. breve</i> BR-A29                      | 2.4               | 1988        | 62         | 253               | 141                     | 90x           | A29                                            | +              | -              | +              | +             | BCXT01000000 |
| 10  | <i>B. breve</i> BR-C29                      | 2.3               | 2016        | 41         | 228               | 147                     | 100x          | C29                                            | -              | -              | +              | -             | BCXU01000000 |
| 11  | <i>B. breve</i> BR-H29                      | 2.5               | 2224        | 39         | 363               | 214                     | 90x           | H29                                            | -              | -              | +              | -             | BCXV01000000 |
| 12  | <i>B. breve</i> BR-I29                      | 2.2               | 1928        | 39         | 196               | 131                     | 80x           | I29                                            | +              | -              | +              | +             | BCXW01000000 |
| 13  | <i>B. breve</i> BR-L29                      | 2.3               | 2057        | 44         | 357               | 126                     | 200x          | L29                                            | -              | -              | +              | -             | BCXX01000000 |
| 14  | <i>B. dentium</i> DE-29                     | 2.6               | 2127        | 26         | 275               | 191                     | 140x          | TB29                                           | -              | +              | -              | -             | BCYE01000000 |
| 15  | <i>B. longum</i> ss. <i>infantis</i> IN-07  | 2.7               | 2441        | 114        | 286               | 86                      | 310x          | TB07                                           | +              | +              | +              | +             | BCYF01000000 |
| 16  | <i>B. longum</i> ss. <i>infantis</i> IN-F29 | 2.6               | 2356        | 58         | 241               | 131                     | 90x           | F29                                            | +              | +              | +              | +             | BCYG01000000 |
| 17  | <i>B. longum</i> ss. <i>longum</i> LO-06    | 2.4               | 2034        | 77         | 329               | 72                      | 40x           | TB06                                           | -              | -              | -              | -             | BCYH01000000 |
| 18  | <i>B. longum</i> ss. <i>longum</i> LO-10    | 2.5               | 2153        | 80         | 275               | 113                     | 100x          | TB10                                           | -              | -              | -              | -             | BCYI01000000 |
| 19  | <i>B. longum</i> ss. <i>longum</i> LO-21    | 2.7               | 2209        | 71         | 480               | 131                     | 160x          | TB21                                           | -              | -              | -              | -             | BCYJ01000000 |
| 20  | <i>B. longum</i> ss. <i>longum</i> LO-C29   | 2.5               | 2073        | 49         | 224               | 112                     | 110x          | C29                                            | -              | -              | -              | -             | BCYK01000000 |
| 21  | <i>B. longum</i> ss. <i>longum</i> LO-K29a  | 2.4               | 2030        | 85         | 268               | 93                      | 160x          | K29                                            | -              | -              | -              | -             | BCYL01000000 |
| 22  | <i>B. longum</i> ss. <i>longum</i> LO-K29b  | 2.4               | 1987        | 97         | 283               | 92                      | 300x          | K29                                            | -              | -              | -              | -             | BCYM01000000 |
| 23  | <i>B. pseudocatenulatum</i> CA-05           | 2.2               | 1896        | 24         | 449               | 272                     | 140x          | TB05                                           | -              | -              | -              | -             | BCXY01000000 |
| 24  | <i>B. pseudocatenulatum</i> CA-B29          | 2.3               | 1904        | 43         | 440               | 354                     | 160x          | B29                                            | -              | -              | -              | -             | BCXZ01000000 |
| 25  | <i>B. pseudocatenulatum</i> CA-C29          | 2.2               | 1825        | 72         | 312               | 115                     | 60x           | C29                                            | +              | -              | +              | +             | BCYA01000000 |
| 26  | <i>B. pseudocatenulatum</i> CA-D29          | 2.3               | 1903        | 86         | 292               | 84                      | 60x           | D29                                            | -              | -              | -              | -             | BCYB01000000 |
| 27  | <i>B. pseudocatenulatum</i> CA-K29a         | 2.5               | 2168        | 59         | 576               | 249                     | 230x          | K29                                            | +              | -              | +              | +             | BCYC01000000 |
| 28  | <i>B. pseudocatenulatum</i> CA-K29b         | 2.5               | 2148        | 66         | 367               | 122                     | 70x           | K29                                            | +              | -              | +              | +             | BCYD01000000 |
| 29  | <i>B. bifidum</i> BI-14                     | 2.2               | 1779        | 26         | 263               | 157                     | 120x          | TB14                                           | +              | + <sup>c</sup> | + <sup>c</sup> | -             | BCXK01000000 |

<sup>a</sup> These draft genome sequences were deposited in the DDBJ WGS database under BioProject Accession No. PRJDB4597.

<sup>b</sup> N50; the length of the smallest contig within the set of longer contigs, which represent at least half of the cumulative lengths of all contigs.

<sup>c</sup> Only the fucosidase from *B. bifidum* BI-14 is predicted to be an extracellular membrane protein.
